# Supplementary material for: Chiral squaramide-catalyzed highly diastereo- and enantioselective direct Michael addition of nitroalkanes to nitroalkenes
Source: Royal Society of Chemistry journal article supplement (doi:10.1039/c1cc15946a), 2011-01-01
Supplement: c1cc15946a.pdf [file c1cc15946a.pdf]

## *Supporting Information*

# **Chiral squaramide-catalyzed highly diastereo- and enantioselective direct Michael addition of nitroalkanes to nitroalkenes**

Wen Yang and Da-Ming Du\*

*School of Chemical Engineering and Environment, Beijing Institute of Technology,  
Beijing 100081, People's Republic of China*

[dudm@bit.edu.cn](mailto:dudm@bit.edu.cn)

## **Contents**

|                                                                                                   |     |
|---------------------------------------------------------------------------------------------------|-----|
| General Methods.....                                                                              | S1  |
| Materials .....                                                                                   | S1  |
| General procedure for the direct asymmetric Michael addition of nitroalkanes to nitroalkenes..... | S1  |
| Further investigation of substrate scope.....                                                     | S11 |
| The gram-scale preparation and transformation of <b>3a</b> .....                                  | S13 |
| References.....                                                                                   | S14 |
| Copies of <sup>1</sup> H and <sup>13</sup> C NMR spectra of new compounds.....                    | S15 |
| Copies of HPLC profiles of Michael addition products.....                                         | S17 |

## General Methods

Column chromatography was carried out with silica gel (200–300 mesh). Melting points were measured with a XT-4 melting point apparatus without correction.  $^1\text{H}$  NMR spectra were recorded with a Varian Mercury-plus 400 MHz spectrometer. Chemical shifts were reported in ppm with the internal TMS signal at 0.0 ppm as a standard. The data are reported as follows: chemical shift (ppm), multiplicity (s = singlet, d = doublet, t = triplet, q = quartet, m = multiplet or unresolved, br s = broad singlet), coupling constant(s) in Hz, and integration.  $^{13}\text{C}$  NMR spectra were recorded at 100 MHz. Chemical shifts are reported in ppm with the internal chloroform signal at 77.0 ppm as a standard. Infrared spectra were obtained with a Perkin Elmer Spectrum One spectrometer. The ESI-MS spectra were obtained with a Bruker APEX IV mass spectrometer. Optical rotations were measured with Krüss P8000 or WZZ-3 polarimeter at the indicated concentration with unit g/100 mL. The diastereomeric ratios and enantiomeric excesses of the products were determined by chiral HPLC using an Agilent 1200 LC instrument with Daicel Chiralcel column (OD-H, OF) or Daicel Chiralpak columns (AS-H, IB, IA). The absolute configurations of the known adducts were assigned by HPLC and optical rotation comparisons with the reported data<sup>1</sup>, and those of other adducts were assigned by analogy.

## Materials

Commercially available compounds were used without further purification, unless otherwise stated. Nitroalkanes were obtained from commercial sources and used with distillation. Nitroalkenes were prepared according to the literature procedures.<sup>2</sup> Racemic samples of **3a–3r** and **6a–6b** were prepared with 10 mol%  $\text{Et}_3\text{N}$  as the catalyst. The squaramide organocatalysts **I–IV**<sup>3</sup>, **V–VIII**<sup>4</sup>, and **IX–X**<sup>5</sup> were prepared following the reported procedures.

### General procedure for the direct asymmetric addition of nitroalkanes to nitroalkenes

The mixture of nitroalkene **1** (0.2 mmol, 1.0 equiv) and catalyst **IX** (2 mol%) in dichloromethane (0.5 mL) was stirred at  $-20\text{ }^\circ\text{C}$  for 30 min. Then nitroalkene **2** (1.0 mmol, 5.0 equiv) was added. After stirring at  $-20\text{ }^\circ\text{C}$  for 48–96 h, the reaction mixture was concentrated and directly purified by silica gel column chromatography to afford the mixture of the *syn* and *anti* diastereomer of chiral 1,3-dinitro compounds **3**. The mixture was analyzed

to determine the diastereoselectivity and enantioselectivity of the reaction by chiral HPLC. Then the *syn* diastereoisomer was obtained by another column chromatography separation on silica gel, and used for characterization.

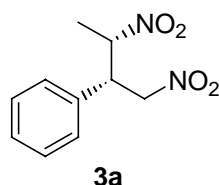

**[(1*S*,2*S*)-2-nitro-1-(nitromethyl)propyl]benzene (**3a**)** (Table 3, entry 1)

The compound **3a** (the mixture of the *syn* and *anti* diastereomer) was obtained according to the general procedure (42.2 mg, 94% yield). It was analyzed to determine the diastereoselectivity and enantioselectivity of the reaction (95:5 dr, 97% ee for the major *syn*-diastereomer) by HPLC (Daicel Chiralpak AS-H column, *n*-hexane/2-propanol = 90:10, flow rate 1.0 mL/min, detection at 210 nm), *syn* diastereomer:  $t_{\text{minor}} = 29.6$  min,  $t_{\text{major}} = 31.3$  min; *anti* diastereomer:  $t_R = 20.2, 21.8$  min.

The *syn* distereomer was purified by flash chromatography to afford a white solid, m.p. 78–80 °C.  $[\alpha]_D^{30} = -6.7$  ( $c$  0.42,  $\text{CH}_2\text{Cl}_2$ ).  $^1\text{H}$  NMR (400 MHz,  $\text{CDCl}_3$ ):  $\delta = 7.35\text{--}7.32$  (m, 3H), 7.16–7.15 (m, 2H), 4.97–4.90 (m, 2H), 4.82 (dd,  $J_1 = 13.6$  Hz,  $J_2 = 8.4$  Hz, 1H), 4.05–4.00 (m, 1H), 1.58 (d,  $J = 6.8$  Hz, 3H).

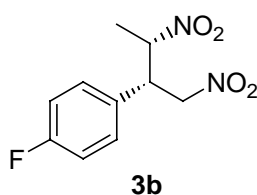

**1-Fluoro-4-[(1*S*,2*S*)-2-nitro-1-(nitromethyl)propyl]benzene (**3b**)** (Table 3, entry 2)

The compound **3b** (the mixture of the *syn* and *anti* diastereomer) was obtained according to the general procedure (47.2 mg, 98% yield). It was analyzed to determine the diastereoselectivity and enantioselectivity of the reaction (94:6 dr, 96% ee for the major *syn*-diastereomer) by HPLC (Daicel Chiralpak IB column, *n*-hexane/2-propanol = 90:10, flow rate 1.0 mL/min, detection at 210 nm), *syn* diastereomer:  $t_{\text{minor}} = 20.5$  min,  $t_{\text{major}} = 23.4$  min; *anti* diastereomer:  $t_R = 15.4, 16.2$  min.

The *syn* distereomer was purified by flash chromatography to afford a white solid, m.p.

125–127 °C.  $[\alpha]_{\text{D}}^{30} = -8.0$  ( $c$  0.40,  $\text{CH}_2\text{Cl}_2$ ).  $^1\text{H}$  NMR (400 MHz,  $\text{CDCl}_3$ ):  $\delta$  = 7.16–7.14 (m, 2H), 7.07–7.03 (m, 2H), 4.95–4.87 (m, 2H), 4.79 (dd,  $J_1 = 13.6$  Hz,  $J_2 = 8.8$  Hz, 1H), 4.03–4.00 (m, 1H), 1.58 (d,  $J = 6.4$  Hz, 3H).

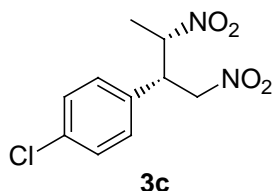

**1-Chloro-4-[(1S,2S)-2-nitro-1-(nitromethyl)propyl]benzene (3c)** (Table 3, entry 3)

The compound **3c** (the mixture of the *syn* and *anti* diastereomer) was obtained according to the general procedure (48.9 mg, 95% yield). It was analyzed to determine the diastereoselectivity and enantioselectivity of the reaction (92:8 dr, 96% ee for the major *syn*-distereomer) by HPLC (Daicel Chiralpak IB column, *n*-hexane/2-propanol = 90:10, flow rate 1.0 mL/min, detection at 210 nm), *syn* diastereomer:  $t_{\text{minor}} = 23.3$  min,  $t_{\text{major}} = 33.3$  min; *anti* diastereomer:  $t_{\text{R}} = 18.2$  min.

The *syn* distereomer was purified by flash chromatography to afford a white solid, m.p. 96–98 °C.  $[\alpha]_{\text{D}}^{30} = -7.2$  ( $c$  0.64,  $\text{CH}_2\text{Cl}_2$ ).  $^1\text{H}$  NMR (400 MHz,  $\text{CDCl}_3$ ):  $\delta$  = 7.34 (d,  $J = 6.4$  Hz, 2H), 7.10 (d,  $J = 6.8$  Hz, 2H), 4.94–4.88 (m, 2H), 4.79 (dd,  $J_1 = 12.4$  Hz,  $J_2 = 8.4$  Hz, 1H), 4.02–3.99 (m, 1H), 1.59 (d,  $J = 4.8$  Hz, 3H).

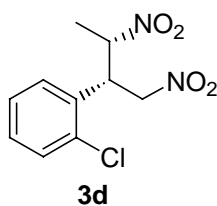

**1-Chloro-2-[(1S,2S)-2-nitro-1-(nitromethyl)propyl]benzene (3d)** (Table 3, entry 4)

The compound **3d** (the mixture of the *syn* and *anti* diastereomer) was obtained according to the general procedure (42.8 mg, 83% yield). It was analysed to determine the diastereoselectivity and enantioselectivity of the reaction (88:12 dr, 95% ee for the major *syn*-distereomer) by HPLC (Daicel Chiralpak IB column, *n*-hexane/2-propanol = 90:10, flow rate 1.0 mL/min, detection at 210 nm), *syn* diastereomer:  $t_{\text{minor}} = 16.2$  min,  $t_{\text{major}} = 27.4$  min; *anti* diastereomer:  $t_{\text{R}} = 12.7$  min.

The *syn* distereomer was purified by flash chromatography to afford a pale yellow oil.  $[\alpha]_{\text{D}}^{30} =$

+10.1 (*c* 0.73, CH<sub>2</sub>Cl<sub>2</sub>). <sup>1</sup>H NMR (400 MHz, CDCl<sub>3</sub>): δ = 7.46–7.44 (m, 1H), 7.29–7.27 (m, 2H), 7.21–7.13 (m, 1H), 5.18–5.14 (m, 1H), 4.95–4.85 (m, 2H), 4.76–4.70 (m, 1H), 1.62 (d, *J* = 6.4 Hz, 3H).

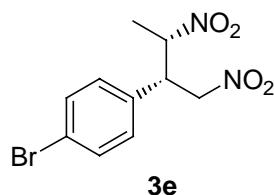

**1-Bromo-4-[(1*S*,2*S*)-2-nitro-1-(nitromethyl)propyl]benzene (3e)** (Table 3, entry 5)

The compound **3e** (the mixture of the *syn* and *anti* diastereomer) was obtained according to the general procedure (55.0 mg, 91% yield). It was analyzed to determine the diastereoselectivity and enantioselectivity of the reaction (94:6 dr, 96% ee for the major *syn*-distereomer) by HPLC (Daicel Chiralpak IB column, *n*-hexane/2-propanol = 85:15, flow rate 1.0 mL/min, detection at 210 nm), *syn* diastereomer: *t*<sub>minor</sub> = 18.4 min, *t*<sub>major</sub> = 29.0 min; *anti* diastereomer: *t*<sub>R</sub> = 14.8, 16.0 min.

The *syn* distereomer was purified by flash chromatography to afford a white solid, m.p. 77–79 °C. [α]<sub>D</sub><sup>30</sup> = –5.2 (*c* 0.85, CH<sub>2</sub>Cl<sub>2</sub>). <sup>1</sup>H NMR (400 MHz, CDCl<sub>3</sub>): δ = 7.53–7.48 (m, 2H), 7.09–7.03 (m, 2H), 4.94–4.87 (m, 2H), 4.78 (dd, *J*<sub>1</sub> = 13.6 Hz, *J*<sub>2</sub> = 8.4 Hz, 1H), 4.01–3.96 (m, 1H), 1.58 (d, *J* = 6.4 Hz, 3H).

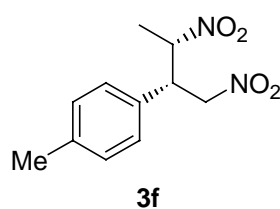

**1-Methyl-4-[(1*S*,2*S*)-2-nitro-1-(nitromethyl)propyl]benzene (3f)** (Table 3, entry 6)

The compound **3f** (the mixture of the *syn* and *anti* diastereomer) was obtained according to the general procedure (43.5 mg, 91% yield). It was analyzed to determine the diastereoselectivity and enantioselectivity of the reaction (91:9 dr, 96% ee for the major *syn*-distereomer) by HPLC (Daicel Chiralpak IB column, *n*-hexane/2-propanol = 90:10, flow rate 1.0 mL/min, detection at 210 nm), *syn* diastereomer: *t*<sub>minor</sub> = 17.2 min, *t*<sub>major</sub> = 40.7 min; *anti* diastereomer: *t*<sub>R</sub> = 12.9, 14.3 min.

The *syn* distereomer was purified by flash chromatography to afford a white solid, m.p. 50–52

$^{\circ}\text{C}$ .  $[\alpha]_{\text{D}}^{30} = -11.2$  ( $c$  0.86,  $\text{CH}_2\text{Cl}_2$ ).  $^1\text{H}$  NMR (400 MHz,  $\text{CDCl}_3$ ):  $\delta$  = 7.14 (d,  $J$  = 7.2 Hz, 2H), 7.03 (d,  $J$  = 7.2 Hz, 2H), 4.94–4.87 (m, 2H), 4.79 (dd,  $J_1$  = 13.6 Hz,  $J_2$  = 8.4 Hz, 1H), 3.99–3.94 (m, 1H), 2.31 (s, 3H), 1.56 (d,  $J$  = 6.0 Hz, 3H).

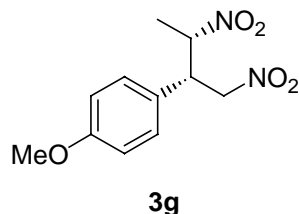

**1-Methoxy-4-[(1S,2S)-2-nitro-1-(nitromethyl)propyl]benzene (3g)** (Table 3, entry 7)

The compound **3g** (the mixture of the *syn* and *anti* diastereomer) was obtained according to the general procedure (46.0 mg, 90% yield). It was analyzed to determine the diastereoselectivity and enantioselectivity of the reaction (94:6 dr, 97% ee for the major *syn*-diastereomer) by HPLC (Daicel Chiralpak IB column, *n*-hexane/2-propanol = 90:10, flow rate 1.0 mL/min, detection at 210 nm), *syn* diastereomer:  $t_{\text{minor}} = 23.1$  min,  $t_{\text{major}} = 37.6$  min; *anti* diastereomer:  $t_{\text{R}} = 17.4, 18.9$  min.

The *syn* distereomer was purified by flash chromatography to afford a white solid, m.p. 80–82  $^{\circ}\text{C}$ .  $[\alpha]_{\text{D}}^{30} = -12.0$  ( $c$  0.98,  $\text{CH}_2\text{Cl}_2$ ).  $^1\text{H}$  NMR (400 MHz,  $\text{CDCl}_3$ ):  $\delta$  = 7.06 (d,  $J$  = 8.4 Hz, 2H), 6.86 (d,  $J$  = 8.4 Hz, 2H), 4.93–4.86 (m, 2H), 4.78 (dd,  $J_1$  = 13.6 Hz,  $J_2$  = 8.4 Hz, 1H), 3.97–3.92 (m, 1H), 3.77 (s, 3H), 1.56 (d,  $J$  = 6.8 Hz, 3H).

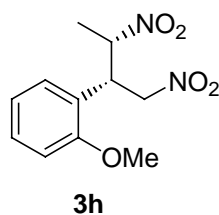

**1-Methoxy-2-[(1S,2S)-2-nitro-1-(nitromethyl)propyl]benzene (3h)** (Table 3, entry 8)

The compound **3h** (the mixture of the *syn* and *anti* diastereomer) was obtained according to the general procedure (44.7 mg, 88% yield). It was analyzed to determine the diastereoselectivity and enantioselectivity of the reaction (94:6 dr, 97% ee for the major *syn*-diastereomer) by HPLC (Daicel Chiralpak IB column, *n*-hexane/2-propanol = 90:10, flow rate 1.0 mL/min, detection at 210 nm), *syn* diastereomer:  $t_{\text{minor}} = 12.5$  min,  $t_{\text{major}} = 16.6$  min;

*anti* diastereomer:  $t_R = 9.0, 9.6$  min.

The *syn* distereomer was purified by flash chromatography to afford a white solid, m.p. 64–66 °C.  $[\alpha]_D^{30} = +4.5$  ( $c$  0.98,  $\text{CH}_2\text{Cl}_2$ ).  $^1\text{H}$  NMR (400 MHz,  $\text{CDCl}_3$ ):  $\delta = 7.31\text{--}7.27$  (m, 1H), 7.05 (d,  $J = 7.2$  Hz, 1H), 6.92–6.89 (m, 2H), 5.16 (dd,  $J_1 = 14.0$  Hz,  $J_2 = 6.8$  Hz, 1H), 4.88–4.86 (m, 2H), 4.30 (dd,  $J_1 = 14.0$  Hz,  $J_2 = 6.8$  Hz, 1H), 3.85 (s, 3H), 1.58 (d,  $J = 6.8$  Hz, 3H).

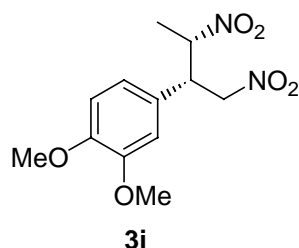

**1,2-Dimethoxy-4-[(1S,2S)-2-nitro-1-(nitromethyl)propyl]benzene (3i)** (Table 3, entry 9)

The compound **3i** (the mixture of the *syn* and *anti* diastereomer) was obtained according to the general procedure (40.5 mg, 71% yield). It was analyzed to determine the diastereoselectivity and enantioselectivity of the reaction (88:12 dr, 96% ee for the major *syn*-distereomer) by HPLC (Daicel Chiralpak IB column, *n*-hexane/2-propanol = 90:10, flow rate 1.0 mL/min, detection at 210 nm), *syn* diastereomer:  $t_{\text{minor}} = 43.5$  min,  $t_{\text{major}} = 46.6$  min; *anti* diastereomer:  $t_R = 30.6$  min.

The *syn* distereomer was purified by flash chromatography to afford a white solid, m.p. 85–86 °C.  $[\alpha]_D^{30} = -15.0$  ( $c$  0.96,  $\text{CH}_2\text{Cl}_2$ ).  $^1\text{H}$  NMR (400 MHz,  $\text{CDCl}_3$ ):  $\delta = 6.82$  (d,  $J = 8.4$  Hz, 1H), 6.71–6.69 (m, 1H), 6.62 (s, 1H), 4.96–4.88 (m, 2H), 4.80 (dd,  $J_1 = 13.2$  Hz,  $J_2 = 8.4$  Hz, 1H), 3.96–3.92 (m, 1H), 3.85 (s, 6H), 1.58 (d,  $J = 6.4$  Hz, 3H).

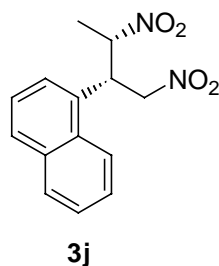

**1-[(1S,2S)-2-nitro-1-(nitromethyl)propyl]naphthalene (3j)** (Table 3, entry 10)

The compound **3j** (the mixture of the *syn* and *anti* diastereomer) was obtained according to the general procedure (43.3 mg, 79% yield). It was analyzed to determine the diastereoselectivity and enantioselectivity of the reaction (92:8 dr, 95% ee for the major

*syn*-distereomer) by HPLC (Daicel Chiralpak IB column, *n*-hexane/2-propanol = 85:15, flow rate 1.0 mL/min, detection at 210 nm), *syn* diastereomer:  $t_{\text{minor}} = 21.2$  min,  $t_{\text{major}} = 78.8$  min; *anti* diastereomer:  $t_R = 14.1, 17.1$  min.

The *syn* distereomer was purified by flash chromatography to afford pale yellow oil.  $[\alpha]_{\text{D}}^{30} = +40.5$  (*c* 0.82,  $\text{CH}_2\text{Cl}_2$ ).  $^1\text{H}$  NMR (400 MHz,  $\text{CDCl}_3$ ):  $\delta = 8.17$  (d,  $J = 7.2$  Hz, 1H), 7.89 (d,  $J = 8.0$  Hz, 1H), 7.83 (d,  $J = 8.0$  Hz, 1H), 7.65–7.62 (m, 1H), 7.55 (t,  $J = 7.2$  Hz, 1H), 7.43 (t,  $J = 7.2$  Hz, 1H), 7.31 (d,  $J = 7.2$  Hz, 1H), 5.15 (dd,  $J_1 = 12.4$  Hz,  $J_2 = 6.4$  Hz, 2H), 4.97 (d,  $J = 6.8$  Hz, 2H), 1.56 (d,  $J = 6.4$  Hz, 3H).

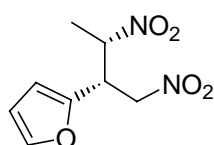

**3k**

**2-[(1S,2S)-2-nitro-1-(nitromethyl)propyl]furan (3k)** (Table 3, entry 11)

The compound **3k** (the mixture of the *syn* and *anti* diastereomer) was obtained according to the general procedure (27.4 mg, 64% yield). It was analyzed to determine the diastereoselectivity and enantioselectivity of the reaction (89:11 *dr*, 96% *ee* for the major *syn*-distereomer) by HPLC (Daicel Chiralcel OD H column, *n*-hexane/2-propanol = 95:5 flow rate 1.0 mL/min, detection at 210 nm), *syn* diastereomer:  $t_{\text{minor}} = 29.3$  min,  $t_{\text{major}} = 30.6$  min; *anti* diastereomer:  $t_R = 21.6, 23.5$  min.

The *syn* distereomer was purified by flash chromatography to afford yellow oil.  $[\alpha]_{\text{D}}^{30} = -27.0$  (*c* 0.40,  $\text{CH}_2\text{Cl}_2$ ).  $^1\text{H}$  NMR (400 MHz,  $\text{CDCl}_3$ ):  $\delta = 7.39$  (d,  $J = 1.2$  Hz, 1H), 6.34 (d,  $J = 1.2$  Hz, 1H), 6.27 (d,  $J = 2.0$  Hz, 1H), 4.93–4.81 (m, 3H), 4.31–4.24 (m, 1H), 1.61 (d,  $J = 6.8$  Hz, 3H).

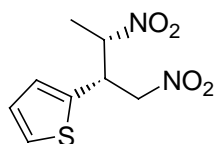

**3l**

**2-[(1S,2S)-2-nitro-1-(nitromethyl)propyl]thiophene (3l)** (Table 3, entry 12)

The compound **3l** (the mixture of the *syn* and *anti* diastereomer) was obtained according to



the general procedure (29.0 mg, 63% yield). It was analyzed to determine the diastereoselectivity and enantioselectivity of the reaction (79:21 dr, 95% ee for the major *syn*-diastereomer) by HPLC (Daicel Chiralpak IB column, *n*-hexane/2-propanol = 90:10, flow rate 1.0 mL/min, detection at 210 nm), *syn* diastereomer:  $t_{\text{minor}} = 19.6$  min,  $t_{\text{major}} = 29.7$  min; *anti* diastereomer:  $t_R = 16.5$  min.

The *syn* distereomer was purified by flash chromatography to afford a white solid, m.p. 66–68 °C.  $[\alpha]_D^{30} = -54.7$  ( $c$  0.34, CH<sub>2</sub>Cl<sub>2</sub>). <sup>1</sup>H NMR (400 MHz, CDCl<sub>3</sub>):  $\delta$  = 7.29 (s, 1H), 6.89 (d,  $J$  = 1.6 Hz, 1H), 6.92 (d,  $J$  = 1.6 Hz, 1H), 4.97–4.94 (m, 2H), 4.85–4.80 (m, 1H), 4.34–4.32 (m, 1H), 1.62 (d,  $J$  = 6.8 Hz, 3H). <sup>13</sup>C NMR (100 MHz, CDCl<sub>3</sub>):  $\delta$  = 134.8, 127.4, 127.2, 126.2, 83.9, 76.7, 42.6, 16.6. IR (KBr):  $\nu$  3110, 2918, 1551, 1432, 1377, 1361, 852, 708 cm<sup>-1</sup>. HRMS (ESI):  $m/z$  calcd. for C<sub>8</sub>H<sub>10</sub>N<sub>2</sub>NaO<sub>4</sub>S [M + Na]<sup>+</sup> 253.02535, found 253.02543.

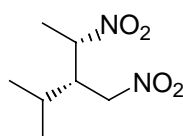

**3m**

**(3*S*,4*S*)-2-Methyl-4-nitro-3-(nitromethyl)pentane (3m)** (Table 3, entry 13)

The compound **3m** (the mixture of the *syn* and *anti* diastereomer) was obtained according to the general procedure (6.1 mg, 16% yield). It was analyzed to determine the diastereoselectivity and enantioselectivity of the reaction (67:33 dr, 80% ee for the major *syn*-diastereomer) by HPLC (Daicel Chiralcel OD H column, *n*-hexane/2-propanol = 95:5, flow rate 0.5 mL/min, detection at 210 nm), *syn* diastereomer:  $t_{\text{major}} = 27.1$  min,  $t_{\text{minor}} = 28.8$  min; *anti* diastereomer:  $t_R = 22.3$  min.

The *syn* distereomer was purified by flash chromatography to afford colorless oil.  $[\alpha]_D^{30} = +4.0$  ( $c$  0.20, CH<sub>2</sub>Cl<sub>2</sub>). <sup>1</sup>H NMR (400 MHz, CDCl<sub>3</sub>):  $\delta$  = 4.81–4.78 (m, 1H), 4.51–4.42 (m, 2H), 2.98–2.87 (m, 1H), 1.89–1.86 (m, 1H), 1.56 (d,  $J$  = 5.2 Hz, 3H), 1.05 (d,  $J$  = 4.8 Hz, 3H), 0.92 (d,  $J$  = 5.2 Hz, 3H).

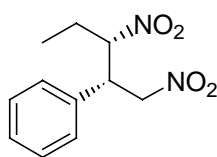

**3n**

**[(1*S*,2*S*)-2-nitro-1-(nitromethyl)butyl]benzene (**3n**)** (Table 3, entry 14)

The compound **3n** (the mixture of the *syn* and *anti* diastereomer) was obtained according to the general procedure (37.8 mg, 79% yield). It was analyzed to determine the diastereoselectivity and enantioselectivity of the reaction (88:12 dr, 92% ee for the major *syn*-diastereomer) by HPLC (Daicel Chiralpak IB column, *n*-hexane/2-propanol = 90:10, flow rate 1.0 mL/min, detection at 210 nm), *syn* diastereomer:  $t_{\text{minor}} = 16.0$  min,  $t_{\text{major}} = 57.8$  min; *anti* diastereomer:  $t_R = 12.0$  min.

The *syn* distereomer was purified by flash chromatography to afford a white solid, m.p. 51–53 °C.  $[\alpha]_{\text{D}}^{30} = -9.8$  ( $c$  0.92,  $\text{CH}_2\text{Cl}_2$ ).  $^1\text{H}$  NMR (400 MHz,  $\text{CDCl}_3$ ):  $\delta = 7.34$  (s, 3H), 7.16 (s, 2H), 4.90–4.86 (m, 1H), 4.79–4.74 (m, 2H), 4.06–4.03 (m, 1H), 2.03–1.99 (m, 1H), 1.89–1.87 (m, 1H), 1.01 (t,  $J = 6.8$  Hz, 3H).

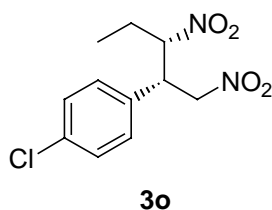

**1-Chloro-4-[(1*S*,2*S*)-2-nitro-1-(nitromethyl)butyl]benzene (**3o**)** (Table 3, entry 15)

The compound **3o** (the mixture of the *syn* and *anti* diastereomer) was obtained according to the general procedure (48.0 mg, 88% yield). It was analyzed to determine the diastereoselectivity and enantioselectivity of the reaction (89:11 dr, 96% ee for the major *syn*-diastereomer) by HPLC (Daicel Chiralpak IB column, *n*-hexane/2-propanol = 90:10, flow rate 0.5 mL/min, detection at 210 nm), *syn* diastereomer:  $t_{\text{minor}} = 38.5$  min,  $t_{\text{major}} = 63.8$  min; *anti* diastereomer:  $t_R = 25.5, 27.4$  min.

The *syn* distereomer was purified by flash chromatography to afford a white solid, m.p. 97–98 °C.  $[\alpha]_{\text{D}}^{30} = -4.4$  ( $c$  0.50,  $\text{CH}_2\text{Cl}_2$ ).  $^1\text{H}$  NMR (400 MHz,  $\text{CDCl}_3$ ):  $\delta = 7.33$  (d,  $J = 7.2$  Hz, 2H), 7.10 (d,  $J = 7.6$  Hz, 2H), 4.85 (dd,  $J_1 = 13.2$  Hz,  $J_2 = 5.2$  Hz, 1H), 4.76–4.70 (m, 2H), 4.04–3.99 (m, 1H), 2.04–1.97 (m, 1H), 1.89–1.84 (m, 1H), 1.02 (t,  $J = 6.4$  Hz, 3H).

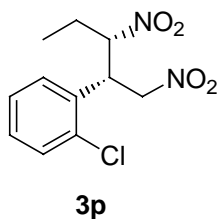

**1-Chloro-2-[(1S,2S)-2-nitro-1-(nitromethyl)butyl]benzene (3p)** (Table 3, entry 16)

The compound **3p** (the mixture of the *syn* and *anti* diastereomer) was obtained according to the general procedure (39.4 mg, 72% yield). It was analyzed to determine the diastereoselectivity and enantioselectivity of the reaction (81:19 dr, 96% ee for the major *syn*-diastereomer) by HPLC (Daicel Chiralpak IB column, *n*-hexane/2-propanol = 90:10, flow rate 1.0 mL/min, detection at 210 nm), *syn* diastereomer:  $t_{\text{minor}} = 12.5$  min,  $t_{\text{major}} = 26.2$  min; *anti* diastereomer:  $t_R = 9.4, 9.9$  min.

The *syn* distereomer was purified by flash chromatography to afford a pale yellow oil.  $[\alpha]_D^{30} = +11.6$  ( $c$  0.91,  $\text{CH}_2\text{Cl}_2$ ).  $^1\text{H}$  NMR (400 MHz,  $\text{CDCl}_3$ ):  $\delta = 7.44$  (d,  $J = 6.4$  Hz, 1H), 7.28–7.25 (m, 2H), 7.16 (d,  $J = 6.4$  Hz, 1H), 5.15–4.95 (m, 1H), 4.92–4.82 (m, 2H), 4.67–4.63 (m, 1H), 2.02–1.95 (m, 2H), 1.02 (t,  $J = 6.4$  Hz, 3H).

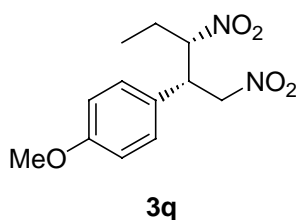

**1-Methoxy-4-[(1S,2S)-2-nitro-1-(nitromethyl)butyl]benzene (3q)** (Table 3, entry 17)

The compound **3q** (the mixture of the *syn* and *anti* diastereomer) was obtained according to the general procedure (34.6 mg, 64% yield). It was analyzed to determine the diastereoselectivity and enantioselectivity of the reaction (92:8 dr, 97% ee for the major *syn*-diastereomer) by HPLC (Daicel Chiralpak IB column, *n*-hexane/2-propanol = 90:10, flow rate 1.0 mL/min, detection at 210 nm), *syn* diastereomer:  $t_{\text{minor}} = 19.0$  min,  $t_{\text{major}} = 34.5$  min; *anti* diastereomer:  $t_R = 12.8$  min.

The *syn* distereomer was purified by flash chromatography to afford a white solid, m.p. 69–71 °C.  $[\alpha]_D^{30} = -11.2$  ( $c$  0.64,  $\text{CH}_2\text{Cl}_2$ ).  $^1\text{H}$  NMR (400 MHz,  $\text{CDCl}_3$ ):  $\delta = 7.06$  (d,  $J = 8.4$  Hz, 2H), 6.85 (d,  $J = 8.4$  Hz, 2H), 4.84 (dd,  $J_1 = 13.2$  Hz,  $J_2 = 6.0$  Hz, 1H), 4.75–4.70 (m, 2H),

4.00–3.94 (m, 1H), 3.78 (s, 3H), 2.04–1.96 (m, 1H), 1.88–1.83 (m, 1H), 1.01 (t,  $J = 7.2$  Hz, 3H).

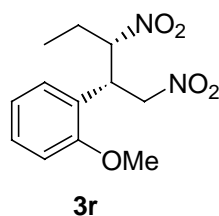

### 1-Methoxy-2-[(1*S*,2*S*)-2-nitro-1-(nitromethyl)butyl]benzene (**3r**) (Table 3, entry 18)

The compound **3r** (the mixture of the *syn* and *anti* diastereomer) was obtained according to the general procedure (31.4 mg, 58% yield). It was analyzed to determine the diastereoselectivity and enantioselectivity of the reaction (90:10 dr, 96% ee for the major *syn*-diastereomer) by HPLC (Daicel Chiralpak IB column, *n*-hexane/2-propanol = 90:10, flow rate 1.0 mL/min, detection at 210 nm), *syn* diastereomer:  $t_{\text{minor}} = 10.4$  min,  $t_{\text{major}} = 14.7$  min; *anti* diastereomer:  $t_R = 7.7, 8.3$  min.

The *syn* distereomer was purified by flash chromatography to afford colorless oil.  $[\alpha]_D^{30} = +9.2$  ( $c$  1.30,  $\text{CH}_2\text{Cl}_2$ ).  $^1\text{H}$  NMR (400 MHz,  $\text{CDCl}_3$ ):  $\delta = 7.29$  (t,  $J = 7.6$  Hz, 1H), 7.04 (d,  $J = 6.4$  Hz, 1H), 6.91–6.89 (m, 2H), 5.03–4.98 (m, 1H), 4.90–4.82 (m, 2H), 4.28–4.23 (m, 1H), 3.86 (s, 3H), 2.03–1.96 (m, 1H), 1.90–1.85 (m, 1H), 0.99 (t,  $J = 6.4$  Hz, 3H).

### Further investigation of substrate scope

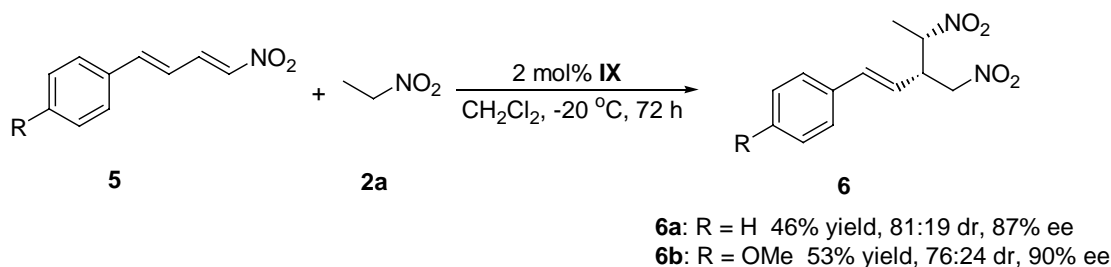

The mixture of nitrodiene **5** (0.4 mmol, 1.0 equiv) and catalyst **IX** (2 mol%) in dichloromethane (1.0 mL) was stirred for 30 min. Then nitroethane **2a** (72  $\mu\text{L}$ , 2.0 mmol, 5.0 equiv) was added. After stirring at  $-20^\circ\text{C}$  for 72 h, the reaction mixture was concentrated and directly purified by silica gel column chromatography to afford the mixture of the *syn* and *anti* diastereomer of chiral 1,3-dinitro compounds **6**. The mixture was analyzed to determine the diastereoselectivity and enantioselectivity of the reaction by chiral HPLC. Then the *syn*

diastereoisomer was obtained by another column chromatography separation on silica gel, and used for characterization.

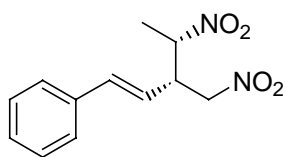

**6a**

**[(1E,3S,4S)-4-nitro-3-(nitromethyl)-1-penten-1-yl]benzene (6a)**

The compound **6a** (the mixture of the *syn* and *anti* diastereomer) was obtained according to the general procedure (46.4 mg, 46% yield). It was analyzed to determine the diastereoselectivity and enantioselectivity of the reaction (81:19 dr, 87% ee for the major *syn*-distereomer) by HPLC (Daicel Chiralpak IB column, *n*-hexane/2-propanol = 90:10, flow rate 1.0 mL/min, detection at 254 nm), *syn* diastereomer:  $t_{\text{minor}} = 22.2$  min,  $t_{\text{major}} = 29.2$  min; *anti* diastereomer:  $t_R = 19.2, 26.1$  min.

The *syn* distereomer was purified by flash chromatography to afford a white solid, m.p. 57–59 °C.  $[\alpha]_D^{30} = -42.5$  ( $c$  0.71,  $\text{CH}_2\text{Cl}_2$ ).  $^1\text{H}$  NMR (400 MHz,  $\text{CDCl}_3$ ):  $\delta = 7.33\text{--}7.30$  (m, 5H), 6.62 (d,  $J = 15.6$  Hz, 1H), 5.90 (dd,  $J_1 = 15.6$  Hz,  $J_2 = 10.0$  Hz, 1H), 4.82–4.79 (m, 1H), 4.75–4.70 (m, 1H), 4.60–4.55 (m, 1H), 3.52–3.45 (m, 1H), 1.62 (d,  $J = 4.8$  Hz, 3H).

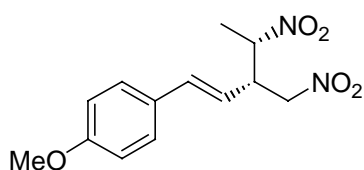

**6b**

**1-Methoxy-4-[(1E,3S,4S)-4-nitro-3-(nitromethyl)-1-penten-1-yl]benzene (6b)**

The compound **6b** (the mixture of the *syn* and *anti* diastereomer) was obtained according to the general procedure (59.3 mg, 53% yield). It was analyzed to determine the diastereoselectivity and enantioselectivity of the reaction (76:24 dr, 90% ee for the major *syn*-distereomer) by HPLC (Daicel Chiralpak IA column, *n*-hexane/2-propanol = 97:3, flow rate 1.0 mL/min, detection at 254 nm), *syn* diastereomer:  $t_{\text{minor}} = 31.8$  min,  $t_{\text{major}} = 33.0$  min; *anti* diastereomer:  $t_R = 35.3, 37.6$  min.

The *syn* distereomer was purified by flash chromatography to afford pale yellow oil.  $[\alpha]_{\text{D}}^{30} = -62.1$  (*c* 0.82,  $\text{CH}_2\text{Cl}_2$ ).  $^1\text{H}$  NMR (400 MHz,  $\text{CDCl}_3$ ):  $\delta = 7.27$  (d,  $J = 7.2$  Hz, 2H), 6.84 (d,  $J = 6.8$  Hz, 2H), 6.54 (d,  $J = 15.2$  Hz, 1H), 5.74 (dd,  $J_1 = 15.2$  Hz,  $J_2 = 9.6$  Hz, 1H), 4.80–4.77 (m, 1H), 4.73–4.96 (m, 1H), 4.58–4.53 (m, 1H), 3.80 (s, 3H), 3.47–3.42 (m, 1H), 1.59 (d,  $J = 6.0$  Hz, 3H).  $^{13}\text{C}$  NMR (100 MHz,  $\text{CDCl}_3$ ):  $\delta = 159.9, 137.1, 128.0, 117.3, 114.0, 83.2, 76.4, 55.3, 45.7, 16.6$ . IR (KBr):  $\nu$  2956, 2924, 2846, 1722, 1651, 1606, 1554, 1511, 1463, 1378, 1250, 1176, 1029, 970, 814, 761  $\text{cm}^{-1}$ . HRMS (ESI):  $m/z$  calcd. for  $\text{C}_{13}\text{H}_{17}\text{N}_2\text{O}_5$   $[\text{M} + \text{H}]^+$  281.11320, found 281.11331.

## The gram-scale preparation and transformation of 3a

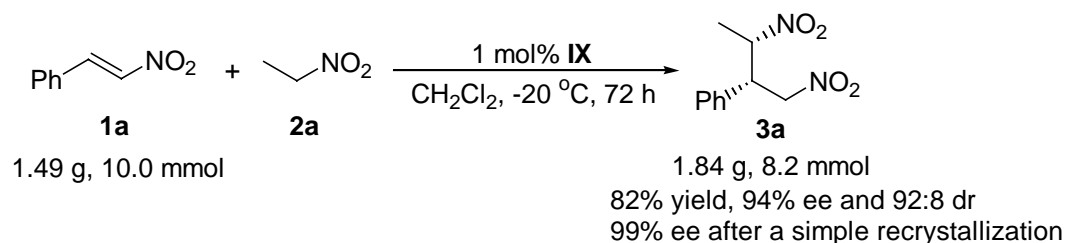

The mixture of nitroalkene **1a** (1.49 g, 10.0 mmol) and catalyst **IX** (72.5 mg, 0.1 mmol, 1 mol%) in dichloromethane (25 mL) was stirred at -20 °C for 30 min. Then nitroalkene **2a** (3.6 mL, 50.0 mmol) was added. After stirring at -20 °C for 72 h, the reaction mixture was concentrated and directly purified by silica gel column chromatography to afford 183 mg of the *anti*-adduct (8% yield) and 1.654 g of the *syn*-adduct (74% yield) , respectively. Enantiomeric excess of the *syn*-adduct (94% ee, 99% ee after a simple recrystallization with ethyl acetate/petroleum ether ) was determined by HPLC with Chiralpak AS-H column.

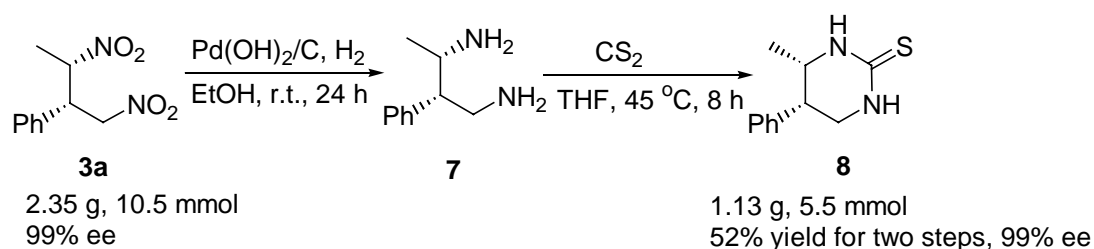

To a solution of the *syn*-adduct **3a** (2.35 g, 10.5 mmol, 99% ee) in EtOH (100 mL) was added 10 wt % Pd(OH)<sub>2</sub>/C (1.47 g, 10 mol%). The mixture was placed under an atmosphere of H<sub>2</sub> in a rubber balloon and stirred for 24 h at room temperature. After filtration, the filtrate was concentrated in vacuo to afford the crude product (1,3-diamine compound **7**) as colorless oil. The colorless oil was dissolved in THF (50 mL), and CS<sub>2</sub> (1.60 g, 21.0 mmol) was added.

After stirring at 45 °C for 8 h, the reaction mixture was concentrated and directly purified by silica gel column chromatography to afford 1.13 g of the thiourea **8** (52% yield) as a white solid. m.p. 223–225 °C. Enantiomeric excess was determined by HPLC (Daicel Chiralcel OF column, *n*-hexane/2-propanol = 70:30, flow rate 1.0 mL/min, detection at 254 nm); major enantiomer  $t_R$  = 29.8 min, minor enantiomer  $t_R$  = 38.6 min; 99% ee;  $[\alpha]_D^{25} = -127.8$  (*c* 0.52, CHCl<sub>3</sub>). <sup>1</sup>H NMR (400 MHz, CDCl<sub>3</sub>):  $\delta$  = 7.35 (t, *J* = 7.2 Hz, 2H), 7.30 (d, *J* = 7.6 Hz, 1H), 7.16 (d, *J* = 7.2 Hz, 2H), 6.84 (br s, 1H), 6.72 (br s, 1H), 3.85–3.82 (m, 1H), 3.62 (dd,  $J_1$  = 6.0 Hz,  $J_2$  = 2.4 Hz, 2H), 3.24 (dd,  $J_1$  = 10.8 Hz,  $J_2$  = 6.0 Hz, 1H), 1.00 (d, *J* = 6.4 Hz, 3H).

## References

1. (a) S. F. Lu, D. M. Du, J. X. Xu and S. W. Zhang, *J. Am. Chem. Soc.*, 2006, **128**, 7418; (b) X. Yang, X. Zhou, L. L. Lin, L. Chang, X. H. Liu and X. M. Feng, *Angew. Chem., Int. Ed.*, 2008, **47**, 7049; (c) C. Rabalakos and W. D. Wulff, *J. Am. Chem. Soc.*, 2008, **130**, 13524; (d) X. Q. Dong, H. L. Teng and C. J. Wang, *Org. Lett.*, 2009, **11**, 1265; (e) T. Ooi, S. Takada, K. Doda and K. Maruoka, *Angew. Chem., Int. Ed.*, 2006, **45**, 7606.
2. (a) C. Dockendorff, S. Sahli, M. Olsen, L. Milhau and M. Lautens, *J. Am. Chem. Soc.*, 2005, **127**, 15028; (b) A. Côté, V. N. G. Lindsay and A. B. Charette, *Org. Lett.*, 2007, **9**, 85; (c) B. M. Trost and M. Müller, *J. Am. Chem. Soc.*, 2008, **130**, 2438;
3. W. Yang and D. M. Du, *Adv. Synth. Catal.*, 2011, **353**, 1241.
4. W. Yang and D. M. Du, *Org. Lett.*, 2010, **12**, 5450.
5. J. W. Lee, T. H. Ryu, J. S. Oh, H. Y. Bae, H. B. Jang and C. E. Song, *Chem. Commun.*, 2009, 7224.

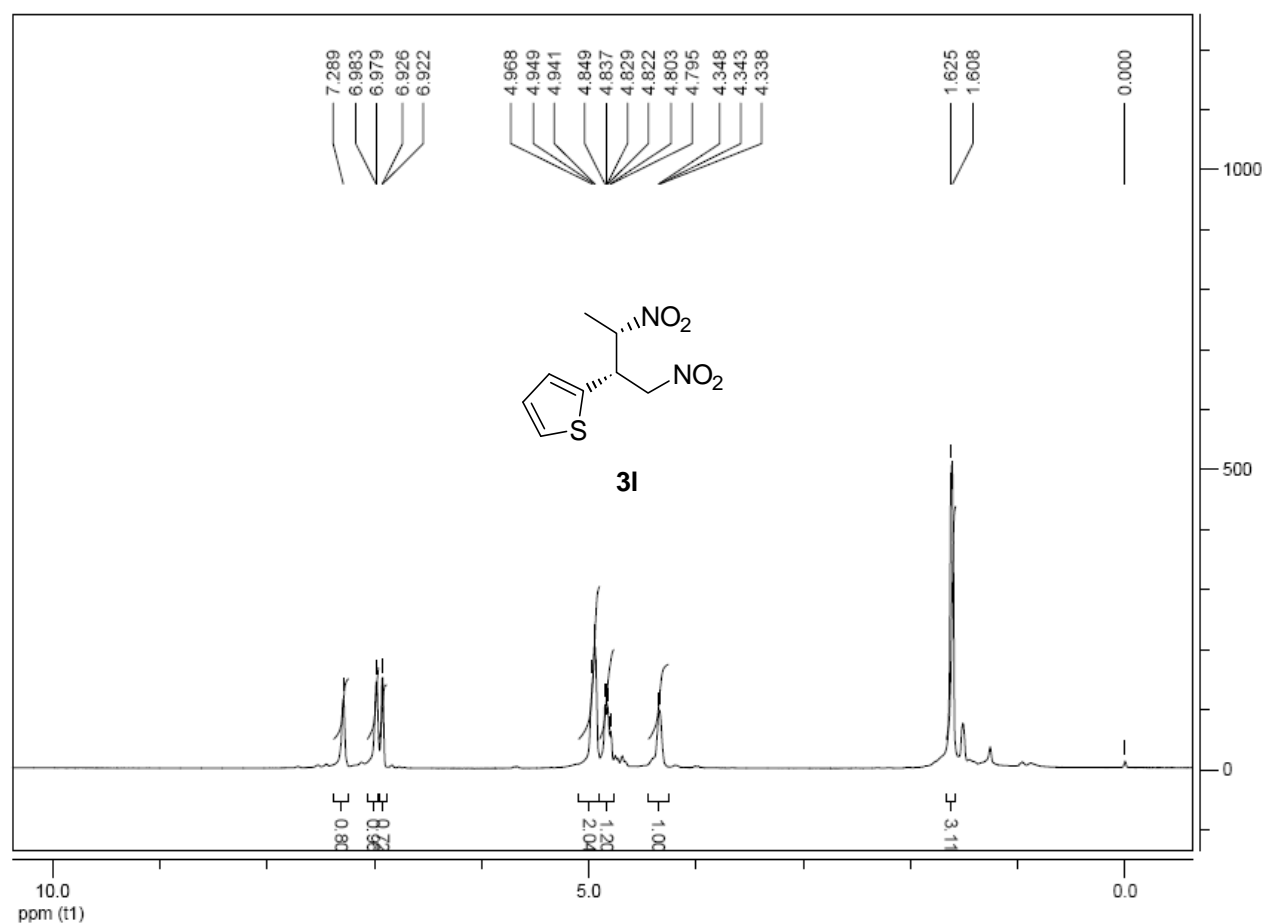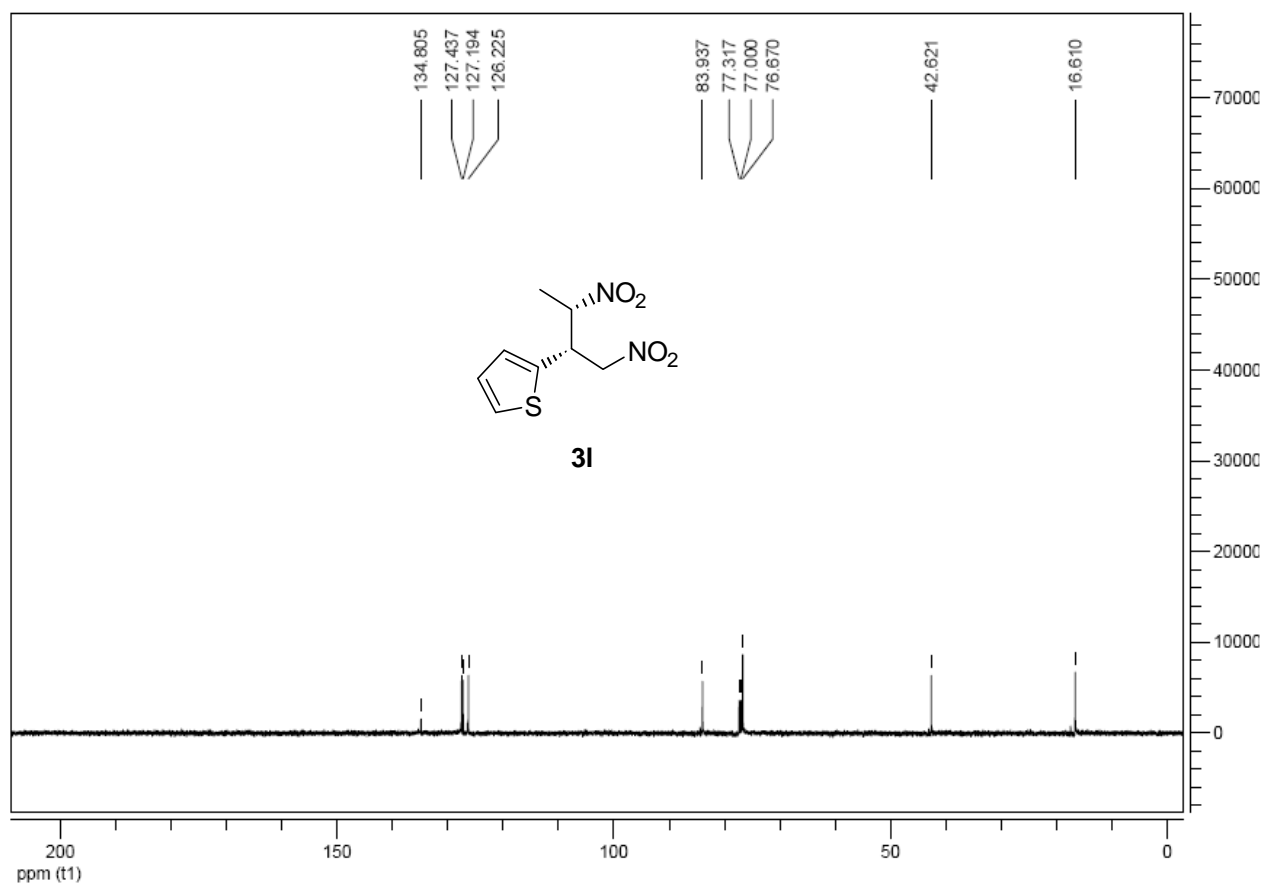



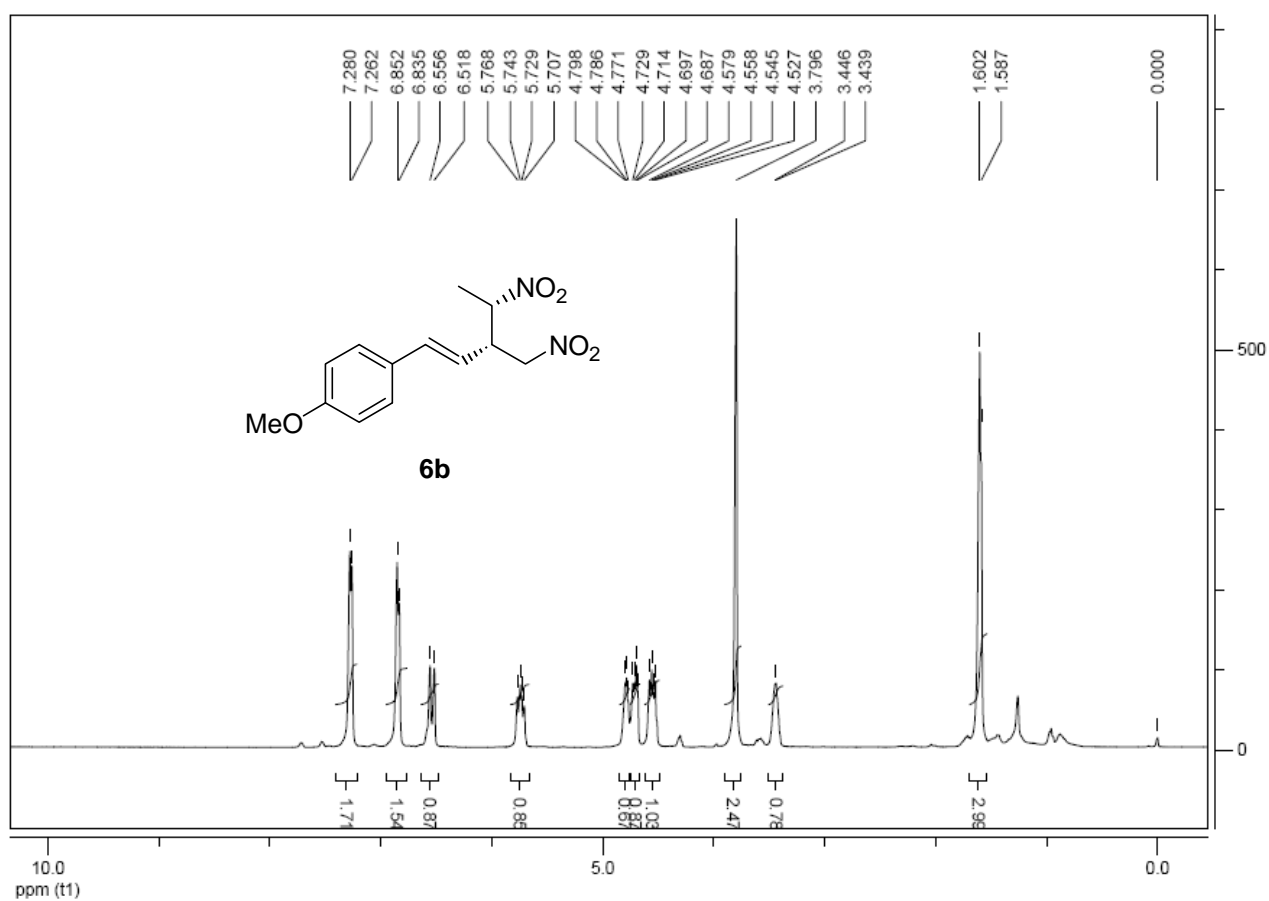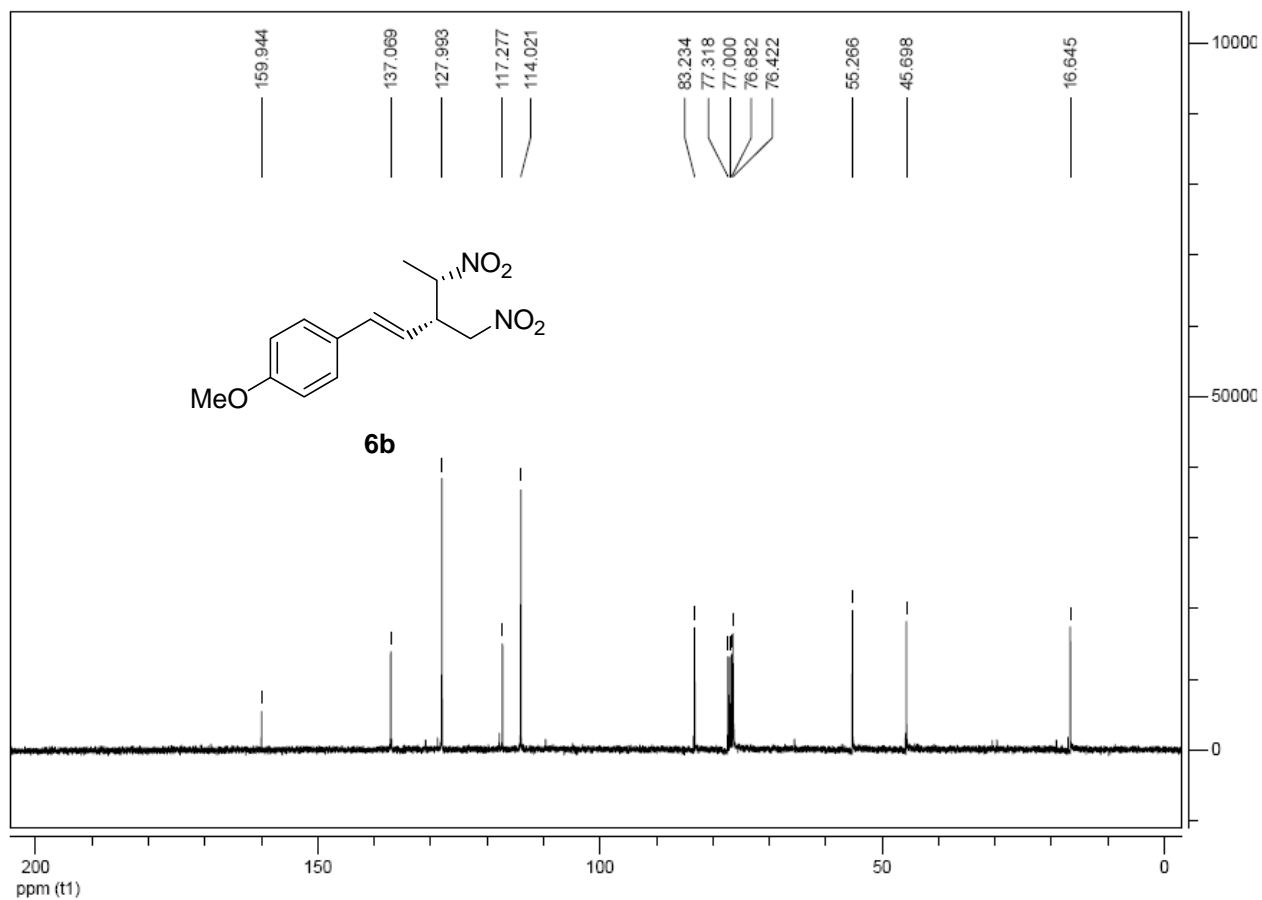

## Copies of HPLC profiles of Michael addition products

### [(1*S*,2*S*)-2-nitro-1-(nitromethyl)propyl]benzene (**3a**) (Table 3, entry 1)

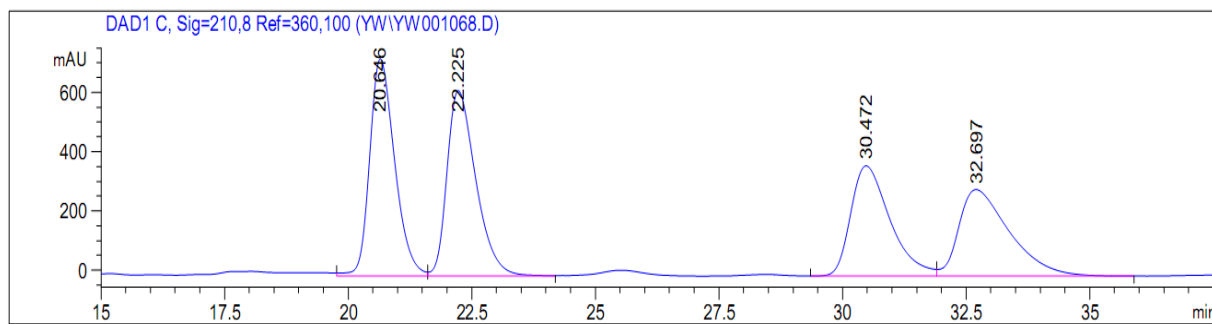

(racemic)

| Peak # | RetTime [min] | Type | Width [min] | Area [mAU*s] | Height [mAU] | Area %  |
|--------|---------------|------|-------------|--------------|--------------|---------|
| 1      | 20.646        | VV   | 0.5432      | 2.57959e4    | 731.90820    | 27.8685 |
| 2      | 22.225        | VB   | 0.6210      | 2.53574e4    | 625.38293    | 27.3948 |
| 3      | 30.472        | VV   | 0.8474      | 2.06440e4    | 372.00656    | 22.3027 |
| 4      | 32.697        | VB   | 1.0695      | 2.07655e4    | 292.04581    | 22.4340 |

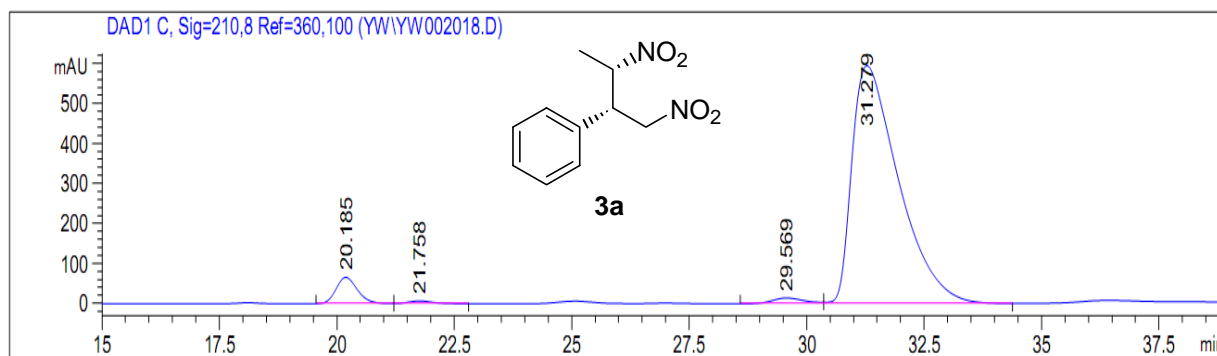

| Peak # | RetTime [min] | Type | Width [min] | Area [mAU*s] | Height [mAU] | Area %  |
|--------|---------------|------|-------------|--------------|--------------|---------|
| 1      | 20.185        | BV   | 0.4864      | 2091.91064   | 65.88589     | 4.7268  |
| 2      | 21.758        | VB   | 0.5411      | 239.63422    | 6.83388      | 0.5415  |
| 3      | 29.569        | BV   | 0.7418      | 696.17700    | 14.45639     | 1.5731  |
| 4      | 31.279        | VB   | 1.0643      | 4.12286e4    | 595.07794    | 93.1587 |

**1-Fluoro-4-[(1*S*,2*S*)-2-nitro-1-(nitromethyl)propyl]benzene (**3b**) (Table 3, entry 2)**

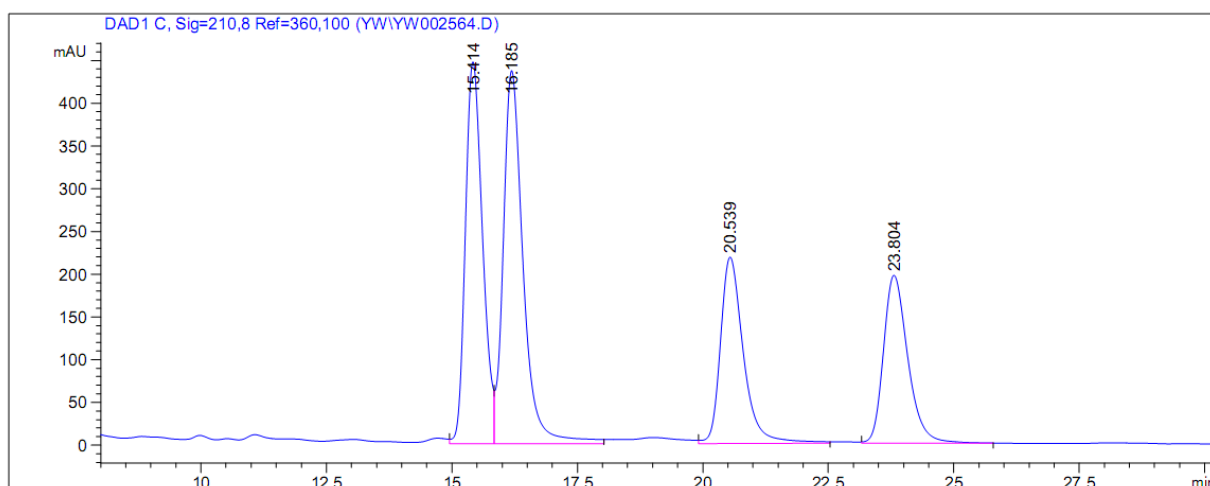

(racemic)

| Peak # | RetTime [min] | Type | Width [min] | Area [mAU*s] | Height [mAU] | Area %  |
|--------|---------------|------|-------------|--------------|--------------|---------|
| 1      | 15.414        | VV   | 0.3691      | 1.06109e4    | 446.78024    | 29.2202 |
| 2      | 16.185        | VB   | 0.4131      | 1.20139e4    | 436.54669    | 33.0838 |
| 3      | 20.539        | VB   | 0.4865      | 7004.39062   | 218.21170    | 19.2886 |
| 4      | 23.804        | BB   | 0.5203      | 6684.43115   | 196.80370    | 18.4075 |

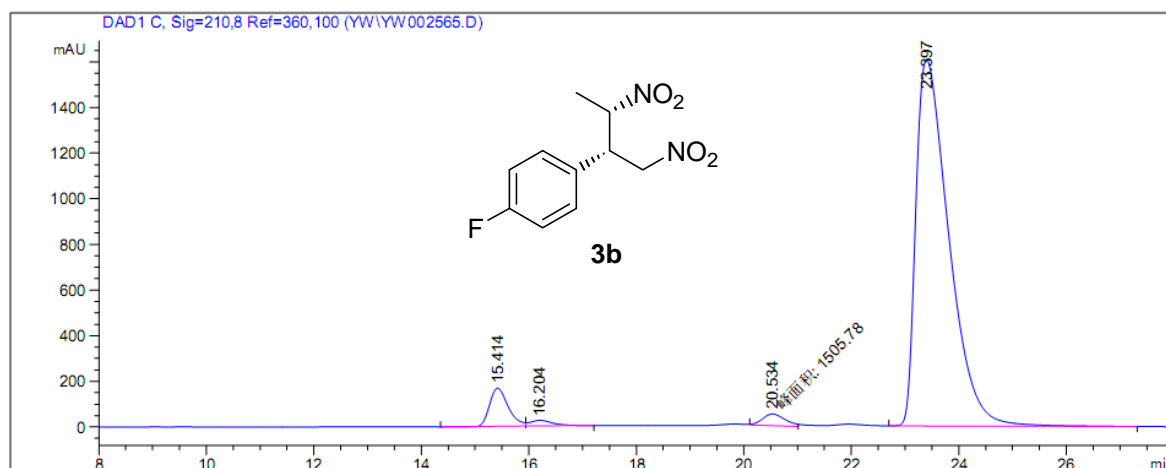

| Peak # | RetTime [min] | Type | Width [min] | Area [mAU*s] | Height [mAU] | Area %  |
|--------|---------------|------|-------------|--------------|--------------|---------|
| 1      | 15.414        | VV   | 0.3729      | 4046.06641   | 168.04848    | 5.3996  |
| 2      | 16.204        | VB   | 0.4552      | 815.51361    | 25.90995     | 1.0883  |
| 3      | 20.534        | MM   | 0.4895      | 1505.77625   | 51.27092     | 2.0095  |
| 4      | 23.397        | VB   | 0.6534      | 6.85651e4    | 1608.10059   | 91.5025 |

**1-Chloro-4-[(1*S*,2*S*)-2-nitro-1-(nitromethyl)propyl]benzene (3c) (Table 3, entry 3)**

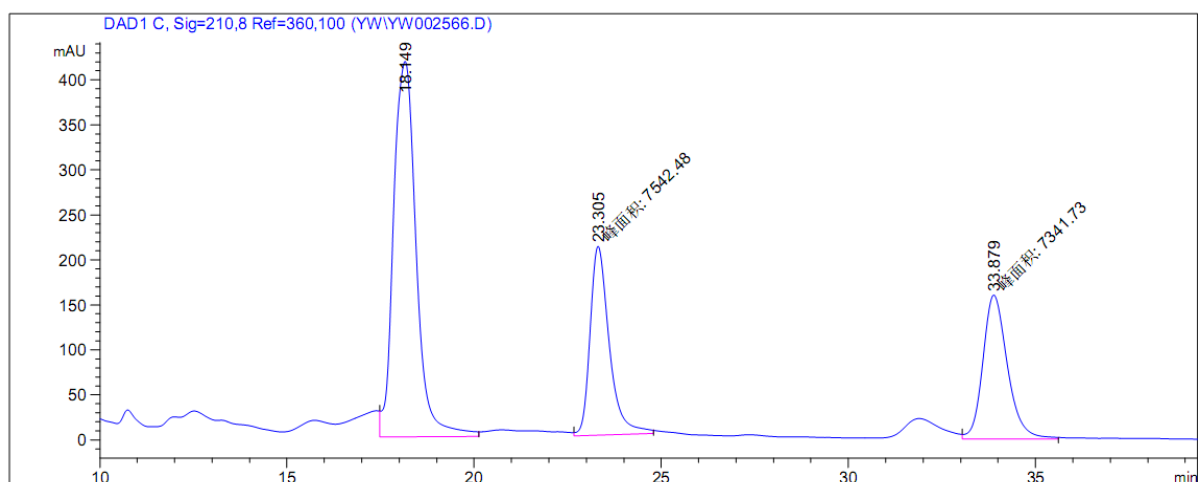

(racemic)

| Peak # | RetTime [min] | Type | Width [min] | Area [mAU*s] | Height [mAU] | Area %  |
|--------|---------------|------|-------------|--------------|--------------|---------|
| 1      | 18.149        | VV   | 0.6643      | 1.76241e4    | 417.62024    | 54.2142 |
| 2      | 23.305        | MM   | 0.5978      | 7542.48047   | 210.29138    | 23.2017 |
| 3      | 33.879        | MM   | 0.7643      | 7341.72949   | 160.09258    | 22.5841 |

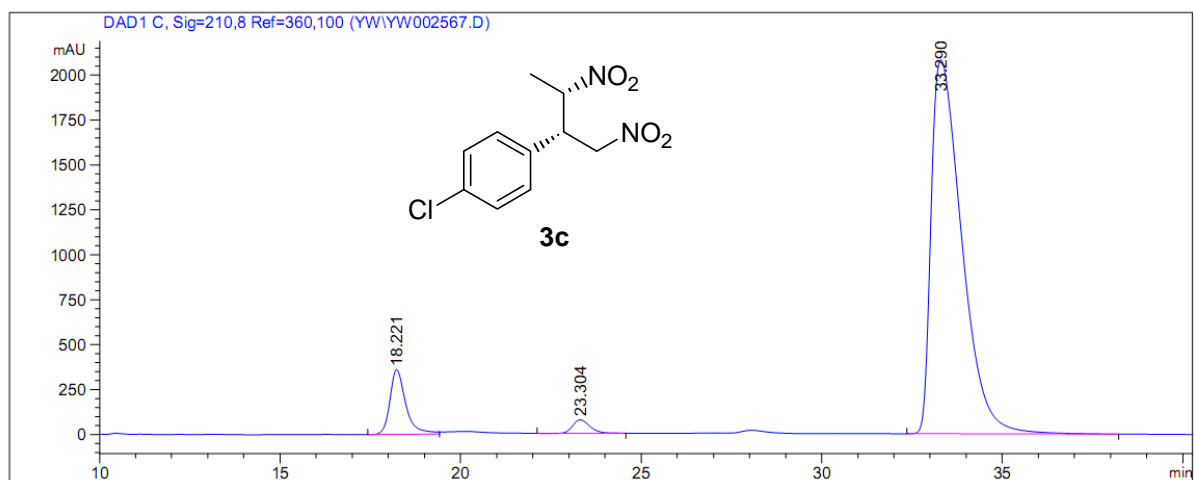

| Peak # | RetTime [min] | Type | Width [min] | Area [mAU*s] | Height [mAU] | Area %  |
|--------|---------------|------|-------------|--------------|--------------|---------|
| 1      | 18.221        | VV   | 0.4648      | 1.11553e4    | 360.71475    | 8.1774  |
| 2      | 23.304        | VB   | 0.5328      | 2719.52051   | 76.85118     | 1.9935  |
| 3      | 33.290        | BB   | 0.9111      | 1.22542e5    | 2080.75537   | 89.8291 |

**1-Chloro-2-[(1S,2S)-2-nitro-1-(nitromethyl)propyl]benzene (3d) (Table 3, entry 4)**

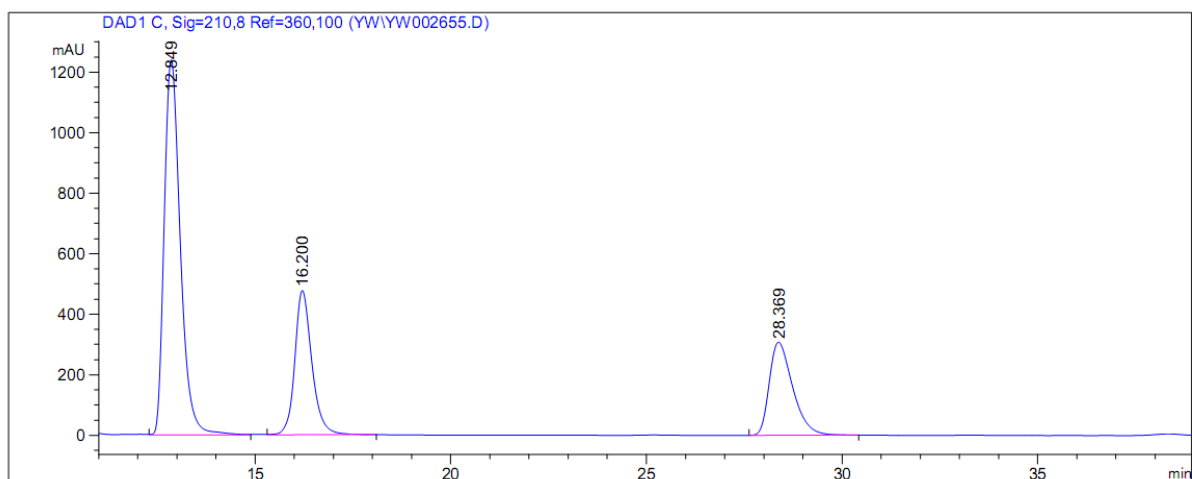

(racemic)

| Peak # | RetTime [min] | Type | Width [min] | Area [mAU*s] | Height [mAU] | Area %  |
|--------|---------------|------|-------------|--------------|--------------|---------|
| 1      | 12.849        | VB   | 0.4464      | 3.55272e4    | 1239.37842   | 56.5099 |
| 2      | 16.200        | BB   | 0.4593      | 1.45279e4    | 477.07352    | 23.1083 |
| 3      | 28.369        | BB   | 0.6378      | 1.28138e4    | 307.69827    | 20.3818 |

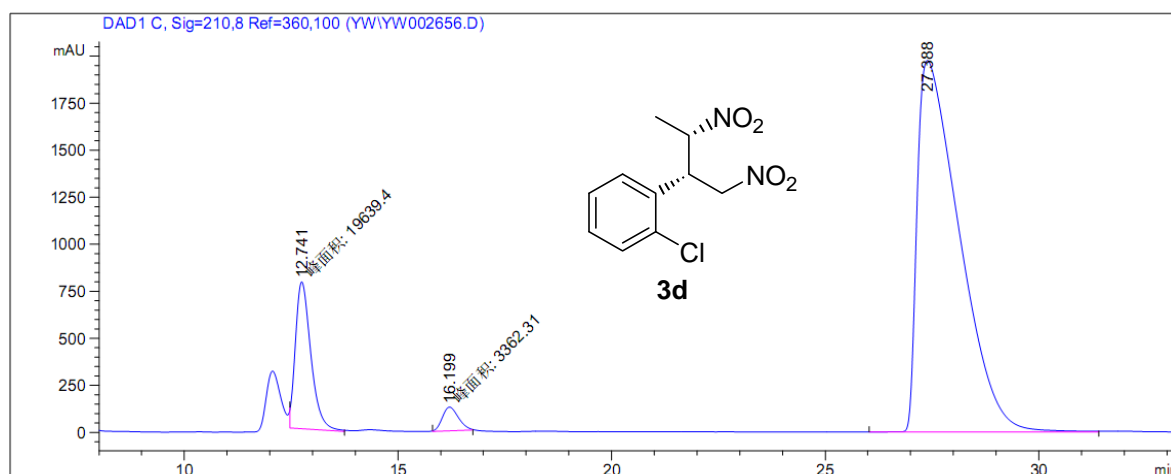

| Peak # | RetTime [min] | Type | Width [min] | Area [mAU*s] | Height [mAU] | Area %  |
|--------|---------------|------|-------------|--------------|--------------|---------|
| 1      | 12.741        | MM   | 0.4182      | 1.96394e4    | 782.66382    | 12.4378 |
| 2      | 16.199        | MM   | 0.4402      | 3362.31030   | 127.29000    | 2.1294  |
| 3      | 27.388        | BV   | 1.0645      | 1.34900e5    | 1975.93774   | 85.4329 |

**1-Bromo-4-[(1*S*,2*S*)-2-nitro-1-(nitromethyl)propyl]benzene (3e) (Table 3, entry 5)**

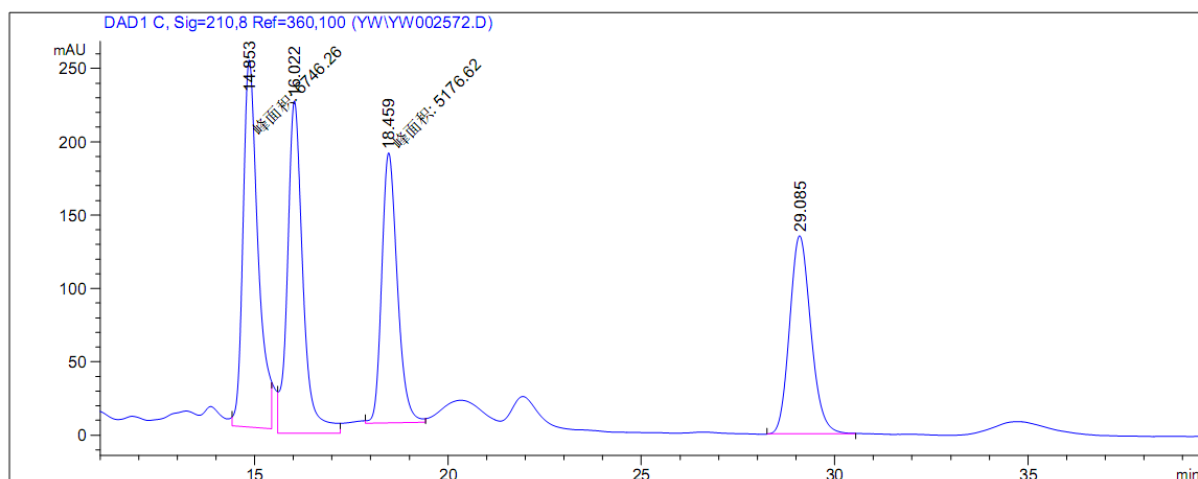

(racemic)

| Peak # | RetTime [min] | Type | Width [min] | Area [mAU*s] | Height [mAU] | Area %  |
|--------|---------------|------|-------------|--------------|--------------|---------|
| 1      | 14.853        | MM   | 0.4486      | 6746.26318   | 250.61475    | 28.8065 |
| 2      | 16.022        | VB   | 0.4167      | 6314.20898   | 226.87080    | 26.9617 |
| 3      | 18.459        | MM   | 0.4681      | 5176.62305   | 184.31537    | 22.1042 |
| 4      | 29.085        | BB   | 0.5911      | 5182.10986   | 135.23743    | 22.1276 |

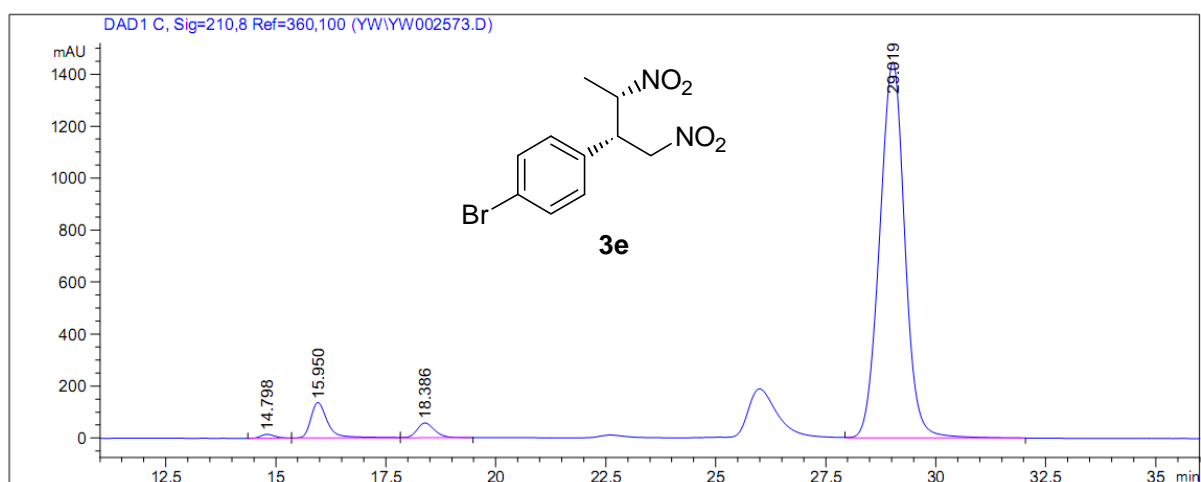

| Peak # | RetTime [min] | Type | Width [min] | Area [mAU*s] | Height [mAU] | Area %  |
|--------|---------------|------|-------------|--------------|--------------|---------|
| 1      | 14.798        | BV   | 0.3575      | 350.94824    | 15.19030     | 0.5559  |
| 2      | 15.950        | VV   | 0.4091      | 3730.29224   | 137.24399    | 5.9084  |
| 3      | 18.386        | VB   | 0.4323      | 1614.28442   | 57.37154     | 2.5569  |
| 4      | 29.019        | VB   | 0.6110      | 5.74397e4    | 1447.40149   | 90.9789 |

**1-Methyl-4-[(1S,2S)-2-nitro-1-(nitromethyl)propyl]benzene (3f) (Table 3, entry 6)**

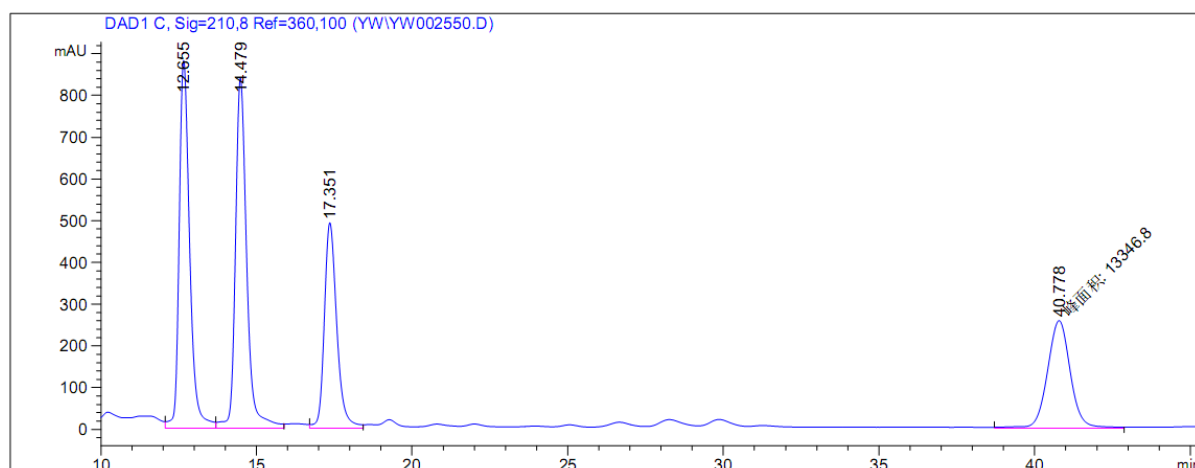

(racemic)

| Peak # | RetTime [min] | Type | Width [min] | Area [mAU*s] | Height [mAU] | Area %  |
|--------|---------------|------|-------------|--------------|--------------|---------|
| 1      | 12.655        | VV   | 0.3623      | 2.07270e4    | 881.71478    | 30.0401 |
| 2      | 14.479        | VV   | 0.3869      | 2.12093e4    | 838.93195    | 30.7392 |
| 3      | 17.351        | VV   | 0.4291      | 1.37146e4    | 492.12997    | 19.8769 |
| 4      | 40.778        | MM   | 0.8615      | 1.33468e4    | 258.19855    | 19.3439 |

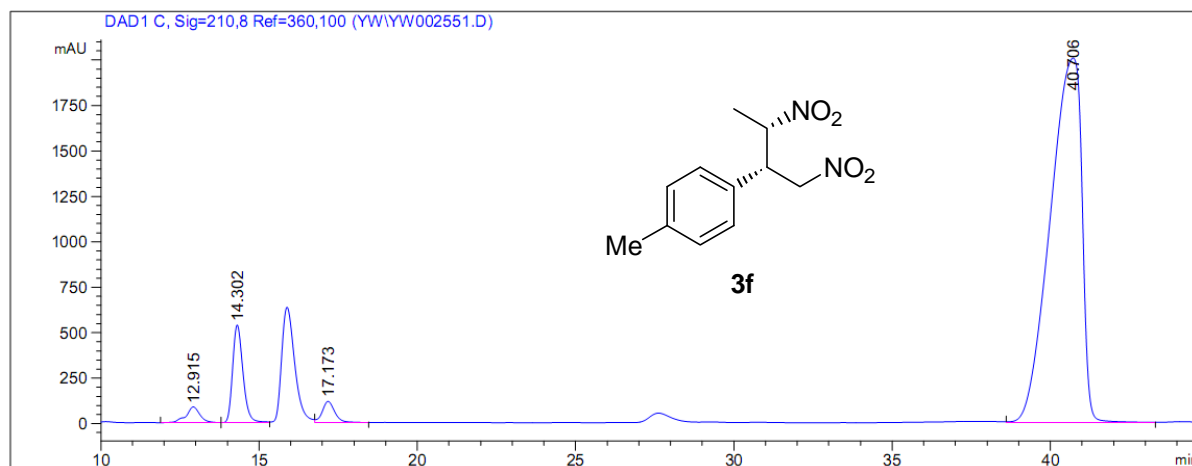

| Peak # | RetTime [min] | Type | Width [min] | Area [mAU*s] | Height [mAU] | Area %  |
|--------|---------------|------|-------------|--------------|--------------|---------|
| 1      | 12.915        | VV   | 0.4502      | 2665.20020   | 86.81057     | 1.6901  |
| 2      | 14.302        | VV   | 0.3539      | 1.22419e4    | 537.14301    | 7.7630  |
| 3      | 17.173        | VB   | 0.4235      | 3241.14380   | 116.87358    | 2.0553  |
| 4      | 40.706        | VV   | 1.0958      | 1.39548e5    | 2005.44519   | 88.4917 |

**1-Methoxy-4-[(1*S*,2*S*)-2-nitro-1-(nitromethyl)propyl]benzene (3g) (Table 3, entry 7)**

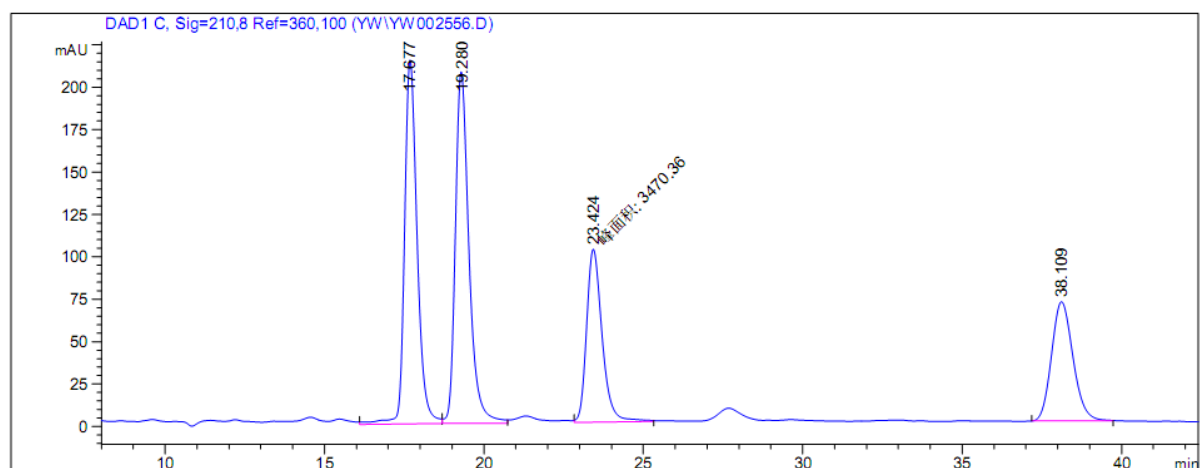

(racemic)

| Peak # | RetTime [min] | Type | Width [min] | Area [mAU*s] | Height [mAU] | Area %  |
|--------|---------------|------|-------------|--------------|--------------|---------|
| 1      | 17.677        | VV   | 0.4172      | 5907.56934   | 214.59361    | 31.3220 |
| 2      | 19.280        | VV   | 0.4509      | 6167.34766   | 207.43471    | 32.6993 |
| 3      | 23.424        | MM   | 0.5661      | 3470.36206   | 102.16521    | 18.3999 |
| 4      | 38.109        | BB   | 0.7290      | 3315.50098   | 70.45744     | 17.5788 |

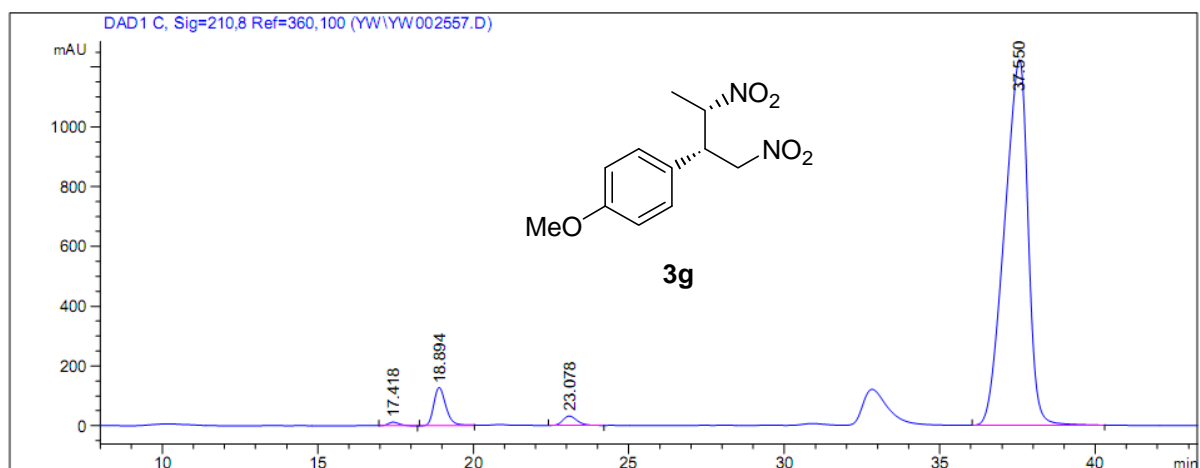

| Peak # | RetTime [min] | Type | Width [min] | Area [mAU*s] | Height [mAU] | Area %  |
|--------|---------------|------|-------------|--------------|--------------|---------|
| 1      | 17.418        | VB   | 0.3939      | 311.10349    | 12.18189     | 0.4500  |
| 2      | 18.894        | BB   | 0.4223      | 3529.77222   | 127.77267    | 5.1061  |
| 3      | 23.078        | BB   | 0.4969      | 1028.53662   | 31.83606     | 1.4879  |
| 4      | 37.550        | BB   | 0.8166      | 6.42589e4    | 1223.69336   | 92.9560 |



**1-Methoxy-2-[(1*S*,2*S*)-2-nitro-1-(nitromethyl)propyl]benzene (3h)** (Table 3, entry 8)

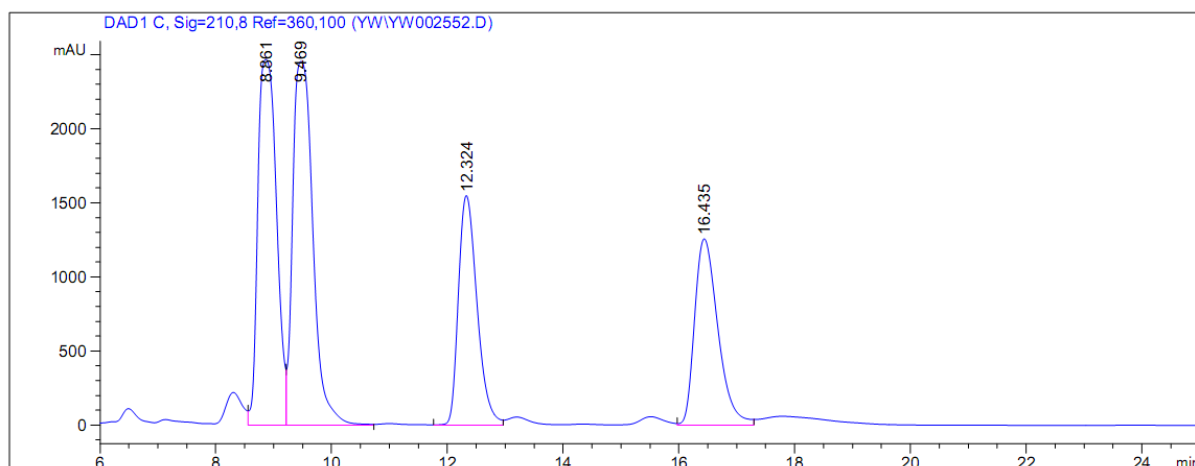

(racemic)

| Peak # | RetTime [min] | Type | Width [min] | Area [mAU*s] | Height [mAU] | Area %  |
|--------|---------------|------|-------------|--------------|--------------|---------|
| 1      | 8.861         | VV   | 0.3612      | 5.53107e4    | 2470.89795   | 29.8567 |
| 2      | 9.469         | VV   | 0.3840      | 5.98385e4    | 2458.26416   | 32.3008 |
| 3      | 12.324        | VV   | 0.3492      | 3.47356e4    | 1551.63721   | 18.7502 |
| 4      | 16.435        | VV   | 0.4356      | 3.53693e4    | 1259.58252   | 19.0923 |

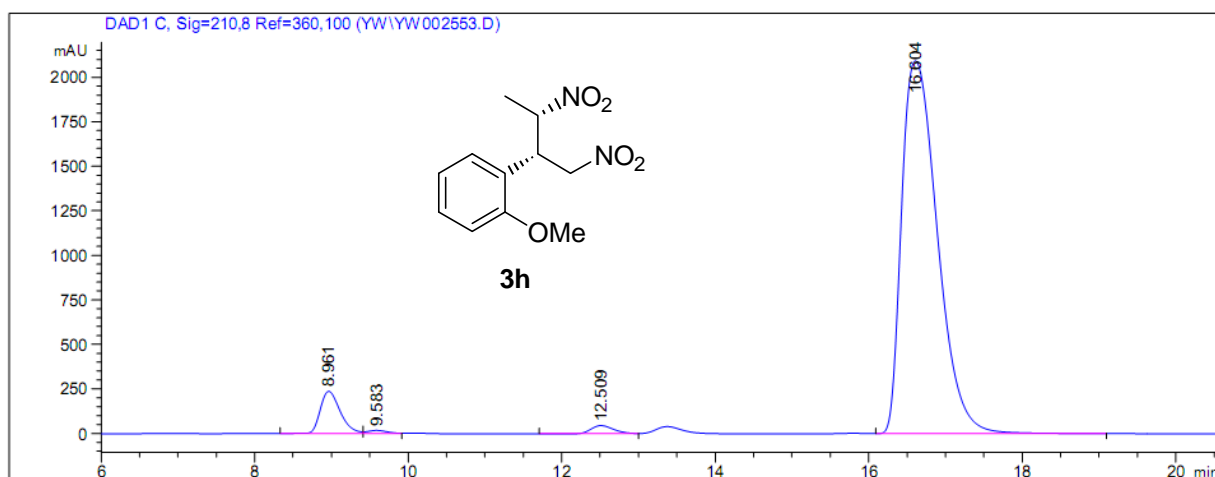

| Peak # | RetTime [min] | Type | Width [min] | Area [mAU*s] | Height [mAU] | Area %  |
|--------|---------------|------|-------------|--------------|--------------|---------|
| 1      | 8.961         | VV   | 0.2822      | 4382.54248   | 238.68210    | 5.9615  |
| 2      | 9.583         | VV   | 0.2894      | 363.52969    | 19.15360     | 0.4945  |
| 3      | 12.509        | VV   | 0.3241      | 969.98822    | 46.35315     | 1.3195  |
| 4      | 16.604        | VB   | 0.5097      | 6.77976e4    | 2094.43115   | 92.2245 |

**1,2-Dimethoxy-4-[(1*S*,2*S*)-2-nitro-1-(nitromethyl)propyl]benzene (**3i**) (Table 3, entry 9)**

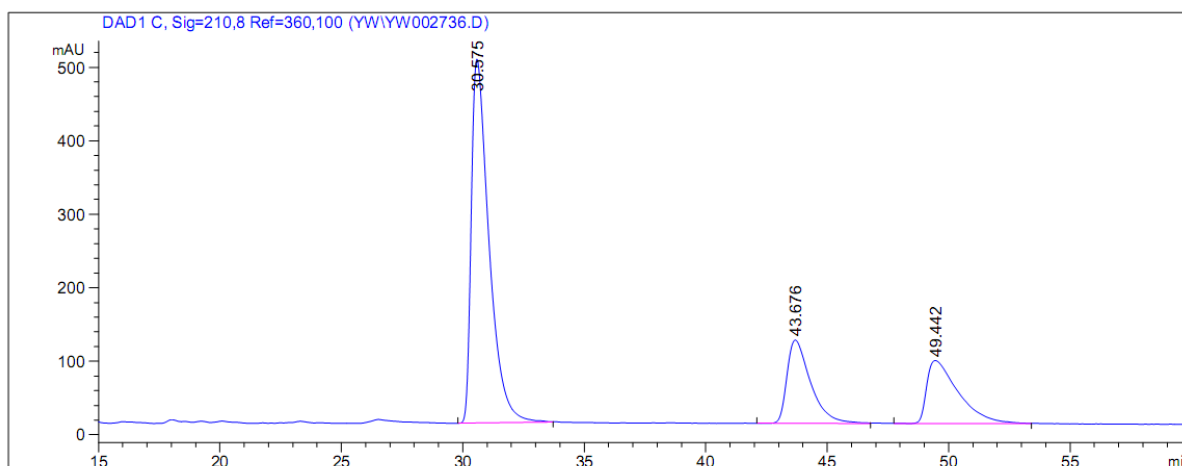

(racemic)

| Peak # | RetTime [min] | Type | Width [min] | Area [mAU*s] | Height [mAU] | Area %  |
|--------|---------------|------|-------------|--------------|--------------|---------|
| 1      | 30.575        | BB   | 0.7574      | 2.51719e4    | 494.92450    | 61.7300 |
| 2      | 43.676        | VB   | 1.0256      | 7724.61572   | 113.56469    | 18.9434 |
| 3      | 49.442        | BB   | 1.3645      | 7880.88770   | 86.05252     | 19.3266 |

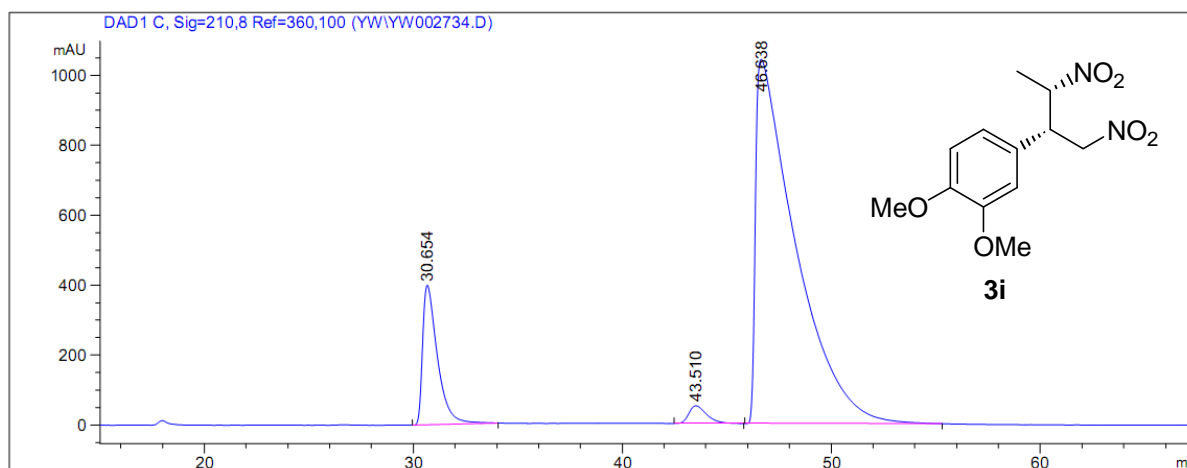

| Peak # | RetTime [min] | Type | Width [min] | Area [mAU*s] | Height [mAU] | Area %  |
|--------|---------------|------|-------------|--------------|--------------|---------|
| 1      | 30.654        | BB   | 0.7359      | 1.98411e4    | 399.16238    | 12.3003 |
| 2      | 43.510        | BB   | 0.9117      | 2994.83789   | 50.51318     | 1.8566  |
| 3      | 46.638        | BB   | 1.7829      | 1.38470e5    | 1041.65942   | 85.8430 |

**1-[(1S,2S)-2-nitro-1-(nitromethyl)propyl]naphthalene (3j)** (Table 3, entry 10)

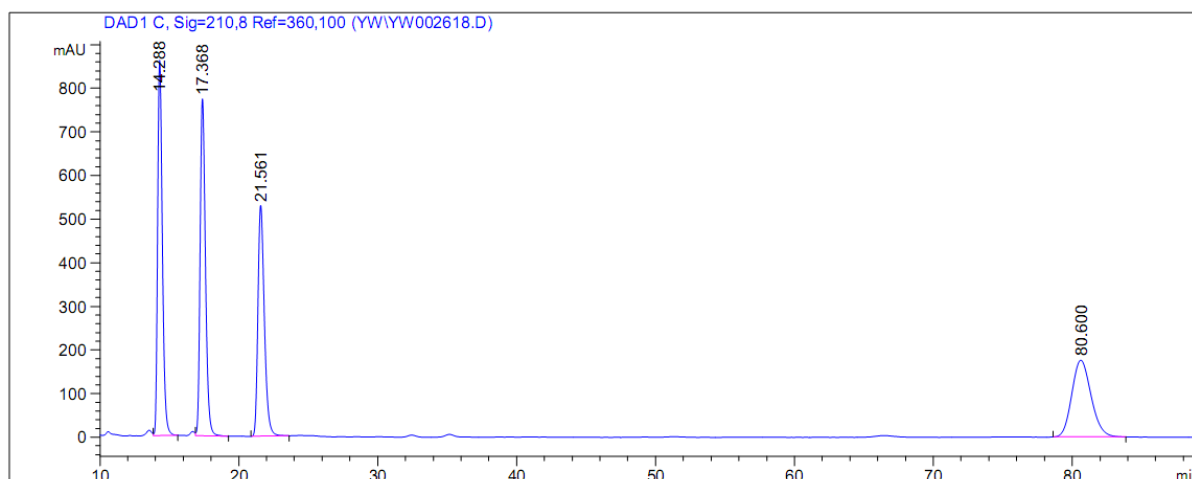

(racemic)

| Peak # | RetTime [min] | Type | Width [min] | Area [mAU*s] | Height [mAU] | Area %  |
|--------|---------------|------|-------------|--------------|--------------|---------|
| 1      | 14.288        | VB   | 0.3650      | 2.04378e4    | 860.79376    | 27.2197 |
| 2      | 17.368        | VB   | 0.4105      | 2.05530e4    | 772.23706    | 27.3732 |
| 3      | 21.561        | BB   | 0.4949      | 1.70013e4    | 529.02228    | 22.6428 |
| 4      | 80.600        | BB   | 1.5063      | 1.70924e4    | 176.42952    | 22.7643 |

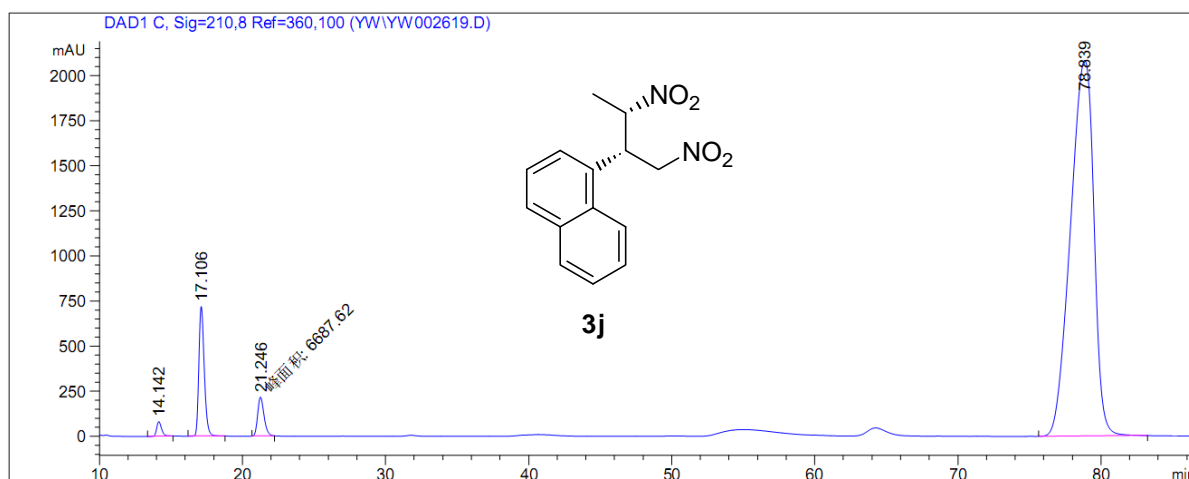

| Peak # | RetTime [min] | Type | Width [min] | Area [mAU*s] | Height [mAU] | Area %  |
|--------|---------------|------|-------------|--------------|--------------|---------|
| 1      | 14.142        | BB   | 0.3669      | 1947.73486   | 81.47685     | 0.7364  |
| 2      | 17.106        | BB   | 0.4038      | 1.89646e4    | 718.87689    | 7.1703  |
| 3      | 21.246        | MM   | 0.5164      | 6687.62451   | 215.84418    | 2.5285  |
| 4      | 78.839        | BB   | 1.7989      | 2.36888e5    | 2082.81982   | 89.5648 |

**2-[(1S,2S)-2-nitro-1-(nitromethyl)propyl]furan (3k)** (Table 3, entry 11)

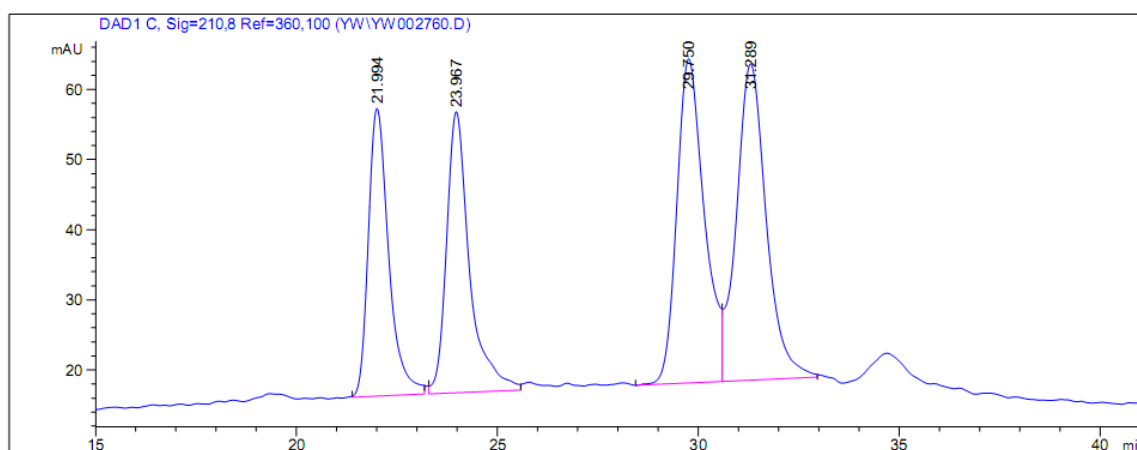

(racemic)

| Peak # | RetTime [min] | Type | Width [min] | Area [mAU*s] | Height [mAU] | Area %  |
|--------|---------------|------|-------------|--------------|--------------|---------|
| 1      | 21.994        | BB   | 0.5378      | 1448.26074   | 41.02683     | 19.0850 |
| 2      | 23.967        | BB   | 0.5964      | 1603.10693   | 40.09898     | 21.1255 |
| 3      | 29.750        | VV   | 0.7161      | 2204.09546   | 46.23941     | 29.0453 |
| 4      | 31.289        | VB   | 0.7790      | 2333.01123   | 45.14212     | 30.7441 |

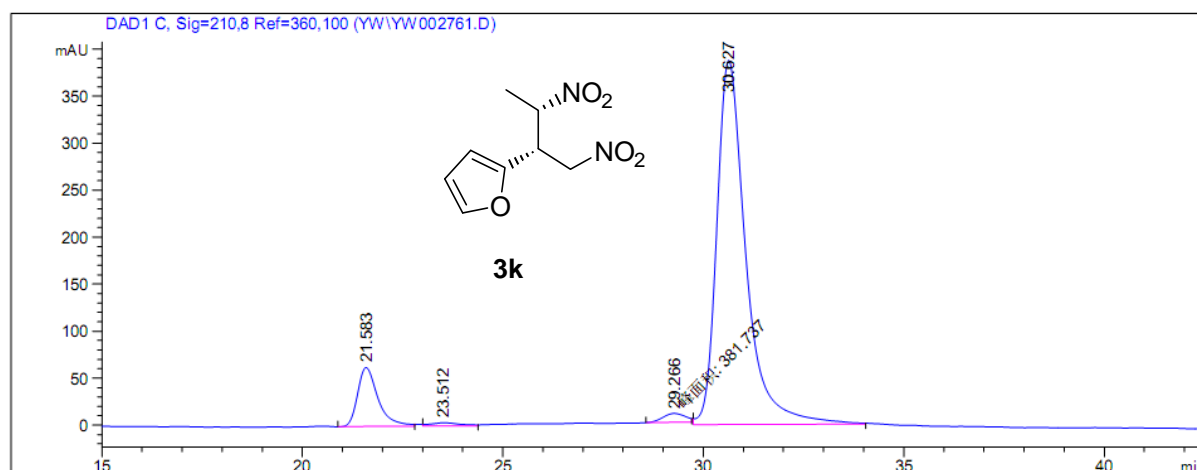

| Peak # | RetTime [min] | Type | Width [min] | Area [mAU*s] | Height [mAU] | Area %  |
|--------|---------------|------|-------------|--------------|--------------|---------|
| 1      | 21.583        | VB   | 0.5391      | 2252.11865   | 62.99090     | 10.0345 |
| 2      | 23.512        | BV   | 0.7255      | 211.84442    | 3.77070      | 0.9439  |
| 3      | 29.266        | MM   | 0.6572      | 381.73734    | 9.68079      | 1.7009  |
| 4      | 30.627        | VB   | 0.7597      | 1.95980e4    | 387.70859    | 87.3207 |

**2-[(1*S*,2*S*)-2-nitro-1-(nitromethyl)propyl]thiophene (**3I**) (Table 3, entry 12)**

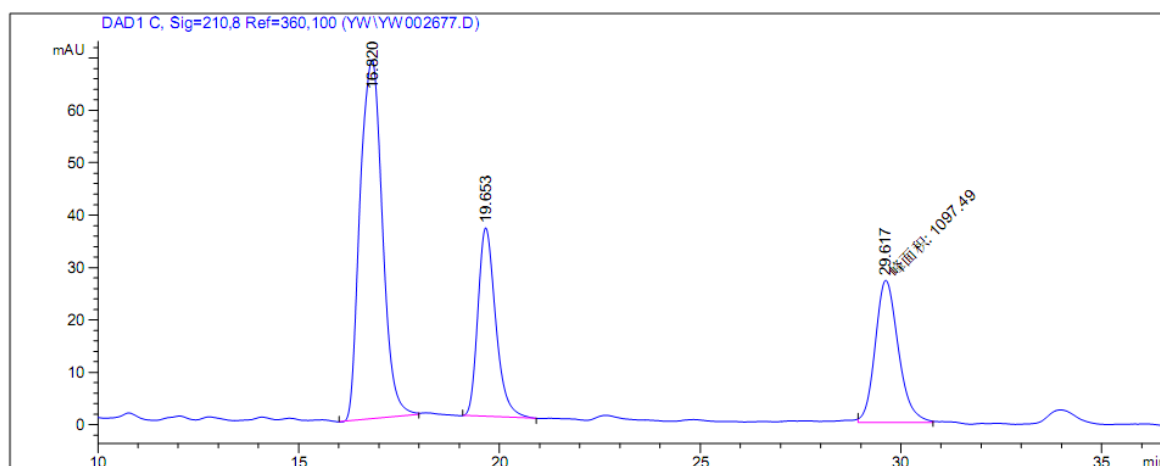

(racemic)

| Peak # | RetTime [min] | Type | Width [min] | Area [mAU*s] | Height [mAU] | Area %  |
|--------|---------------|------|-------------|--------------|--------------|---------|
| 1      | 16.820        | BB   | 0.6262      | 2646.73291   | 68.58443     | 54.5435 |
| 2      | 19.653        | BB   | 0.4753      | 1108.28845   | 35.98270     | 22.8395 |
| 3      | 29.617        | MM   | 0.6718      | 1097.49280   | 27.22573     | 22.6170 |

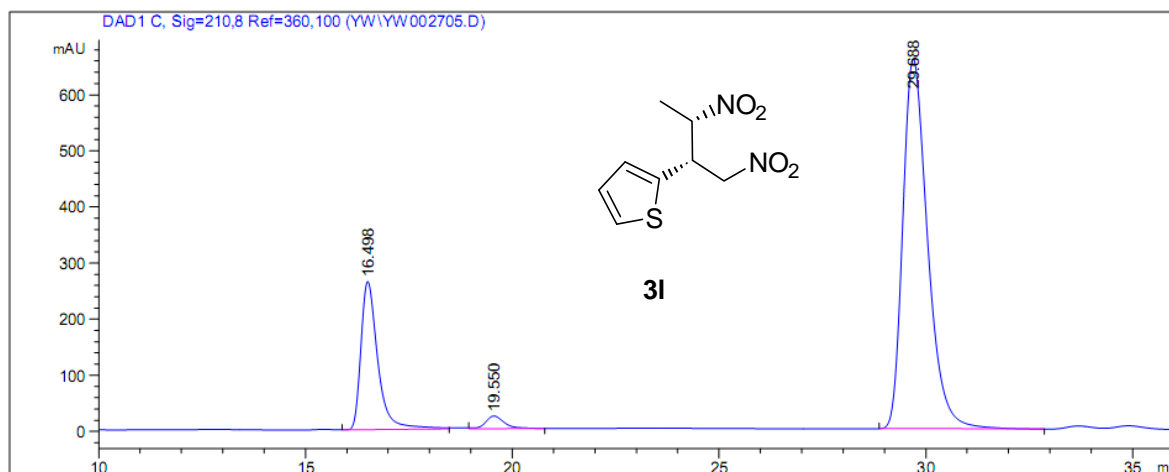

| Peak # | RetTime [min] | Type | Width [min] | Area [mAU*s] | Height [mAU] | Area %  |
|--------|---------------|------|-------------|--------------|--------------|---------|
| 1      | 16.498        | VB   | 0.4338      | 7555.92871   | 264.05371    | 21.0850 |
| 2      | 19.550        | BB   | 0.4867      | 745.31531    | 22.96297     | 2.0798  |
| 3      | 29.688        | BB   | 0.6429      | 2.75343e4    | 659.78186    | 76.8352 |

**(3*S*,4*S*)-2-Methyl-4-nitro-3-(nitromethyl)pentane (3m)** (Table 3, entry 13)

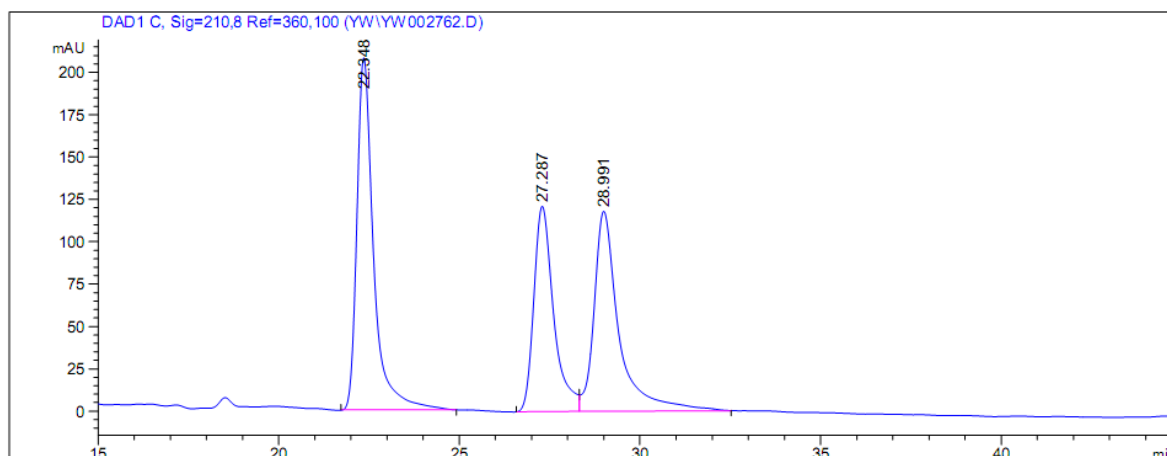

(racemic)

| Peak # | RetTime [min] | Type | Width [min] | Area [mAU*s] | Height [mAU] | Area %  |
|--------|---------------|------|-------------|--------------|--------------|---------|
| 1      | 22.348        | BB   | 0.4807      | 6715.84912   | 208.01157    | 39.3922 |
| 2      | 27.287        | BV   | 0.5743      | 4639.11328   | 121.26227    | 27.2110 |
| 3      | 28.991        | VB   | 0.6981      | 5693.70801   | 118.18575    | 33.3968 |

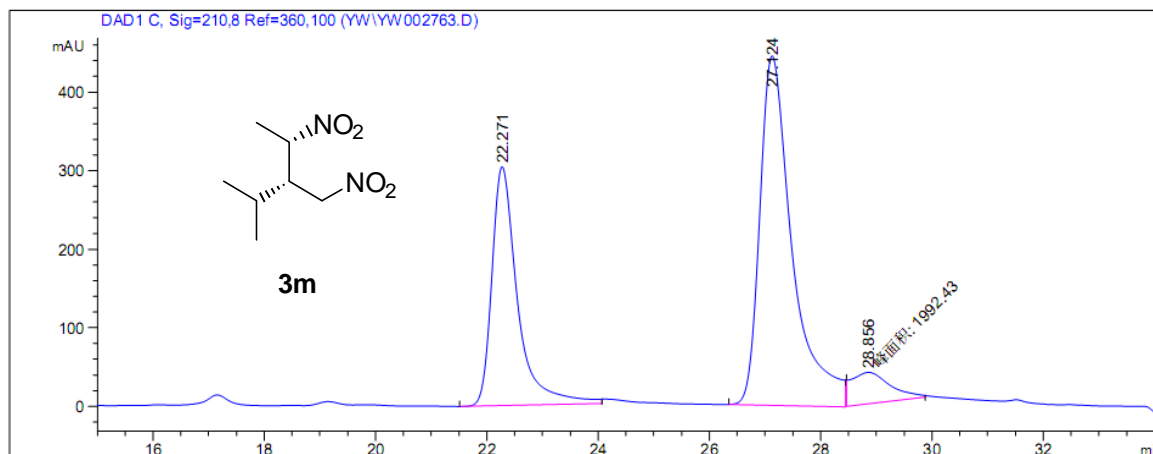

| Peak # | RetTime [min] | Type | Width [min] | Area [mAU*s] | Height [mAU] | Area %  |
|--------|---------------|------|-------------|--------------|--------------|---------|
| 1      | 22.271        | VB   | 0.4791      | 9780.90137   | 304.17566    | 32.7688 |
| 2      | 27.124        | BV   | 0.6056      | 1.80749e4    | 445.25870    | 60.5560 |
| 3      | 28.856        | MM   | 0.8197      | 1992.42896   | 40.50911     | 6.6752  |

**[(1*S*,2*S*)-2-nitro-1-(nitromethyl)butyl]benzene (3n)** (Table 3, entry 14)

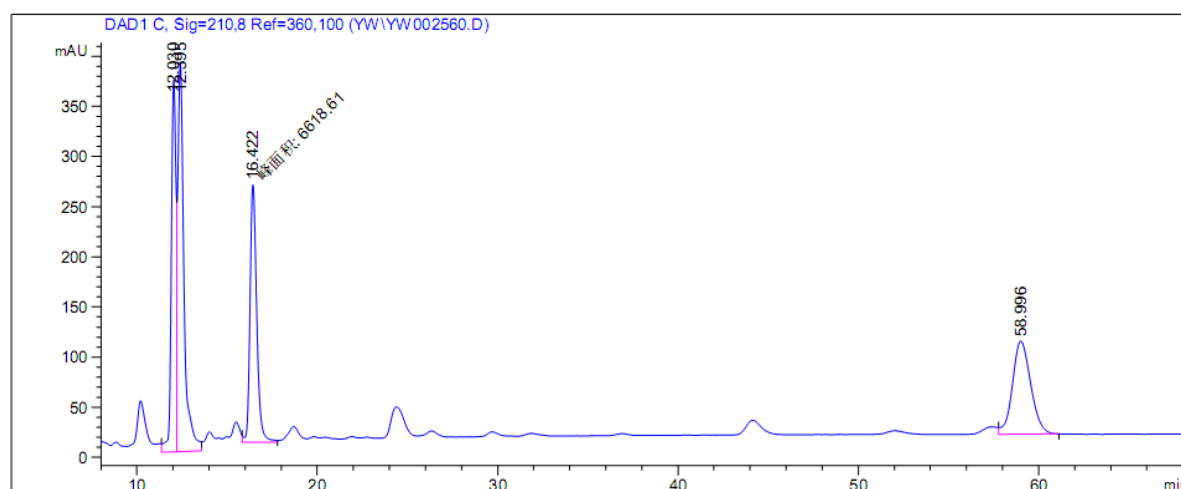

(racemic)

| Peak # | RetTime [min] | Type | Width [min] | Area [mAU*s] | Height [mAU] | Area %  |
|--------|---------------|------|-------------|--------------|--------------|---------|
| 1      | 12.030        | VV   | 0.2760      | 6742.04639   | 371.06805    | 23.1018 |
| 2      | 12.395        | VV   | 0.3501      | 9260.43066   | 388.42801    | 31.7311 |
| 3      | 16.422        | MM   | 0.4296      | 6618.60645   | 256.76227    | 22.6788 |
| 4      | 58.996        | VB   | 1.0869      | 6562.96582   | 93.04486     | 22.4882 |

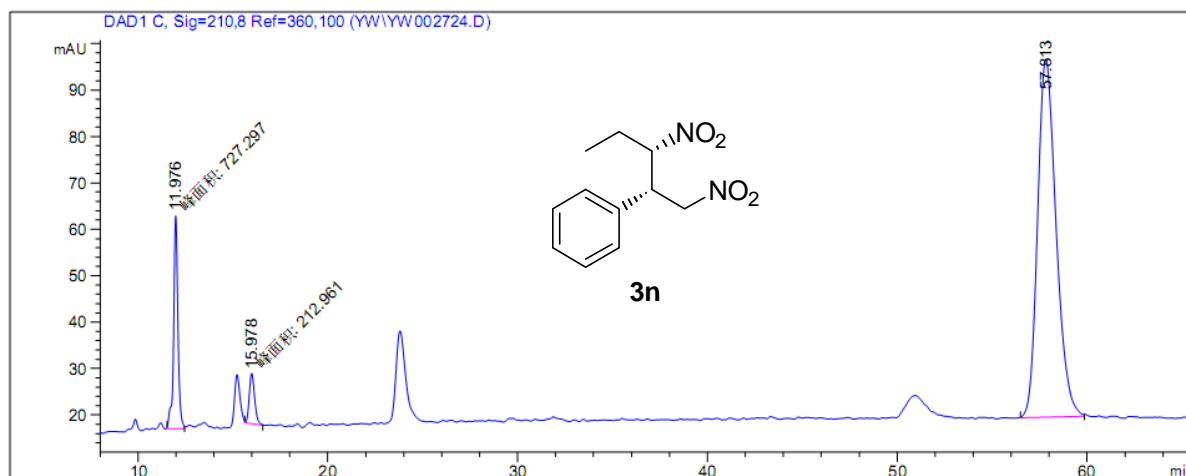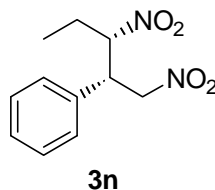

| Peak # | RetTime [min] | Type | Width [min] | Area [mAU*s] | Height [mAU] | Area %  |
|--------|---------------|------|-------------|--------------|--------------|---------|
| 1      | 11.976        | MM   | 0.2640      | 727.29706    | 45.91275     | 11.7671 |
| 2      | 15.978        | MM   | 0.3265      | 212.96124    | 10.87026     | 3.4455  |
| 3      | 57.813        | BB   | 1.0442      | 5240.51660   | 77.17812     | 84.7874 |

**1-Chloro-4-[(1*S*,2*S*)-2-nitro-1-(nitromethyl)butyl]benzene (3o)** (Table 3, entry15)

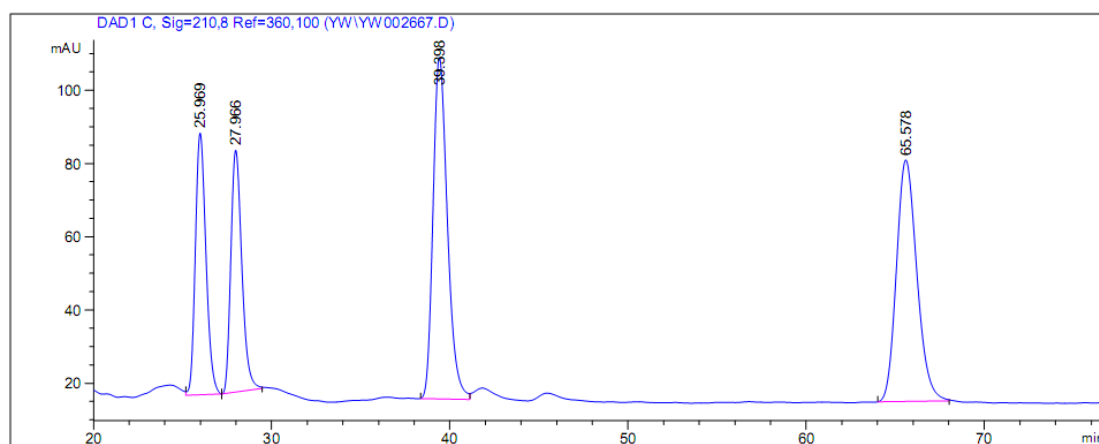

(racemic)

| Peak # | RetTime [min] | Type | Width [min] | Area [mAU*s] | Height [mAU] | Area %  |
|--------|---------------|------|-------------|--------------|--------------|---------|
| 1      | 25.969        | VV   | 0.6430      | 2961.60278   | 71.53230     | 18.1758 |
| 2      | 27.966        | VB   | 0.6696      | 2841.75049   | 66.09180     | 17.4402 |
| 3      | 39.398        | BB   | 0.8574      | 5222.30859   | 93.25040     | 32.0500 |
| 4      | 65.578        | BB   | 1.2269      | 5268.57275   | 66.02775     | 32.3340 |

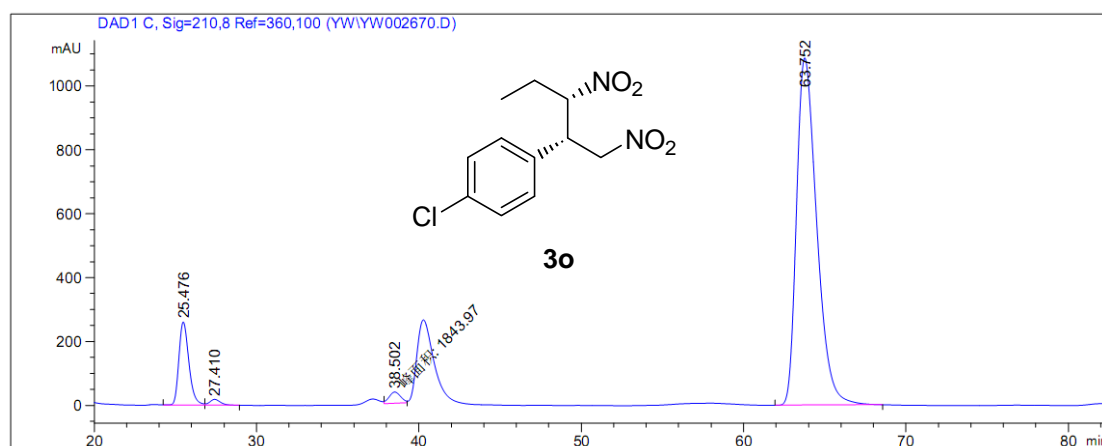

| Peak # | RetTime [min] | Type | Width [min] | Area [mAU*s] | Height [mAU] | Area %  |
|--------|---------------|------|-------------|--------------|--------------|---------|
| 1      | 25.476        | VV   | 0.6628      | 1.12448e4    | 260.92331    | 10.3888 |
| 2      | 27.410        | VB   | 0.7102      | 879.22180    | 18.64414     | 0.8123  |
| 3      | 38.502        | MM   | 0.8506      | 1843.97168   | 36.13269     | 1.7036  |
| 4      | 63.752        | VB   | 1.3309      | 9.42718e4    | 1087.99536   | 87.0953 |



**1-Chloro-2-[(1*S*,2*S*)-2-nitro-1-(nitromethyl)butyl]benzene (3p)** (Table 3, entry 16)

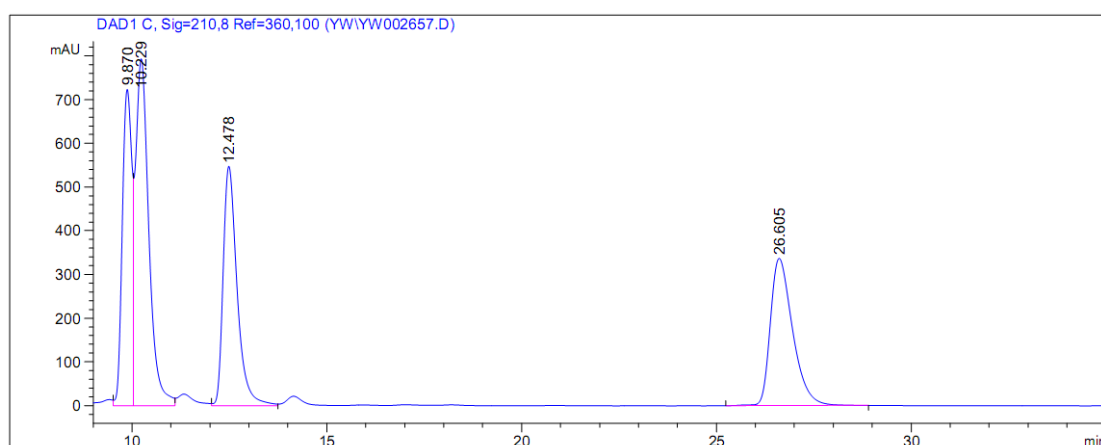

(racemic)

| Peak # | RetTime [min] | Type | Width [min] | Area [mAU*s] | Height [mAU] | Area %  |
|--------|---------------|------|-------------|--------------|--------------|---------|
| 1      | 8.554         | VV   | 0.2262      | 1.61008e4    | 1090.54004   | 21.0127 |
| 2      | 8.841         | VV   | 0.3035      | 2.46118e4    | 1209.01758   | 32.1200 |
| 3      | 10.378        | VV   | 0.3211      | 1.77539e4    | 845.22968    | 23.1700 |
| 4      | 20.349        | MM   | 0.5328      | 1.81580e4    | 568.01459    | 23.6974 |

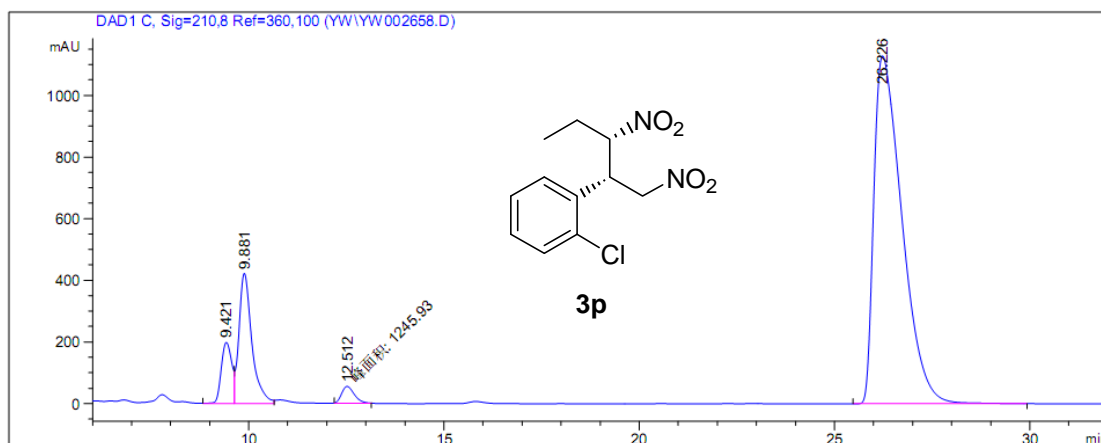

| Peak # | RetTime [min] | Type | Width [min] | Area [mAU*s] | Height [mAU] | Area %  |
|--------|---------------|------|-------------|--------------|--------------|---------|
| 1      | 9.421         | VV   | 0.2949      | 3736.90186   | 199.17834    | 5.2556  |
| 2      | 9.881         | VV   | 0.3451      | 9760.63379   | 423.24365    | 13.7274 |
| 3      | 12.512        | MM   | 0.3775      | 1245.93091   | 55.01082     | 1.7523  |
| 4      | 26.226        | BB   | 0.7905      | 5.63600e4    | 1128.75293   | 79.2648 |

**1-Methoxy-4-[(1S,2S)-2-nitro-1-(nitromethyl)butyl]benzene (3q)** (Table 3, entry17)

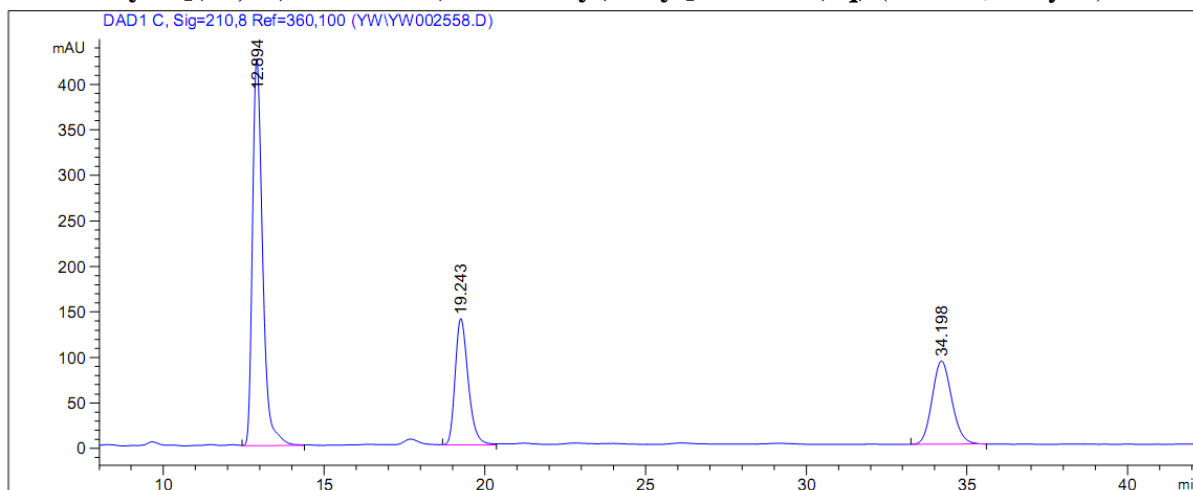

(racemic)

| Peak # | RetTime [min] | Type | Width [min] | Area [mAU*s] | Height [mAU] | Area %  |
|--------|---------------|------|-------------|--------------|--------------|---------|
| 1      | 12.894        | VB   | 0.3366      | 9360.00195   | 425.55746    | 54.5418 |
| 2      | 19.243        | BB   | 0.4329      | 3910.50049   | 138.72722    | 22.7869 |
| 3      | 34.198        | BB   | 0.6601      | 3890.64697   | 91.50182     | 22.6712 |

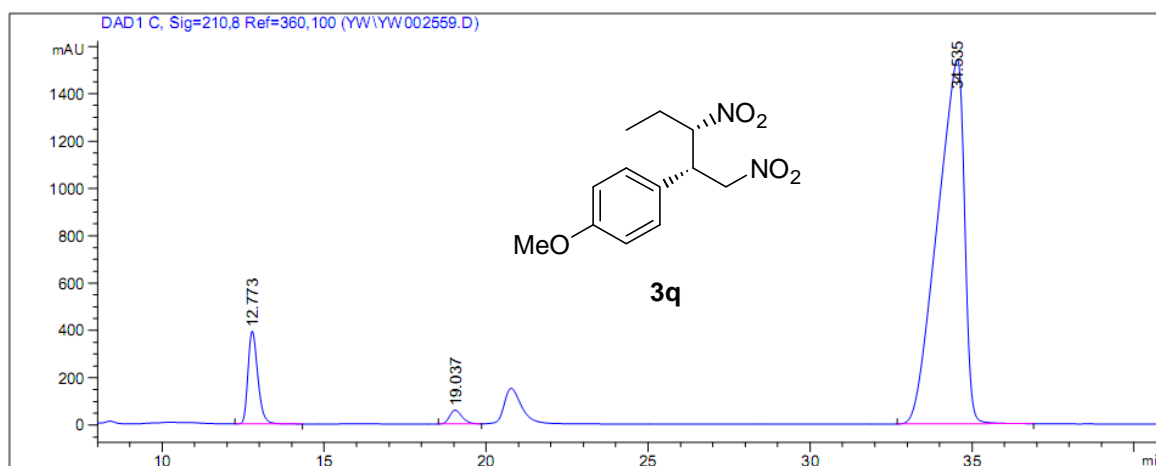

| Peak # | RetTime [min] | Type | Width [min] | Area [mAU*s] | Height [mAU] | Area %  |
|--------|---------------|------|-------------|--------------|--------------|---------|
| 1      | 12.773        | VB   | 0.3272      | 8305.14258   | 391.93497    | 8.3810  |
| 2      | 19.037        | BV   | 0.4245      | 1612.53796   | 58.70742     | 1.6273  |
| 3      | 34.535        | BB   | 0.9154      | 8.91771e4    | 1540.39868   | 89.9917 |

**1-Methoxy-2-[(1*S*,2*S*)-2-nitro-1-(nitromethyl)butyl]benzene (**3r**) (Table 3, entry 18)**

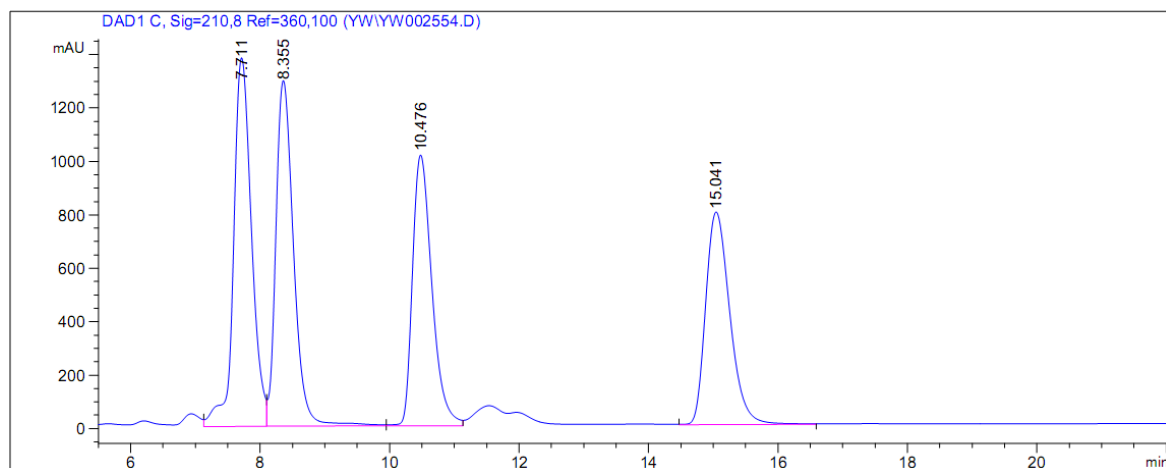

(racemic)

| Peak # | RetTime [min] | Type | Width [min] | Area [mAU*s] | Height [mAU] | Area %  |
|--------|---------------|------|-------------|--------------|--------------|---------|
| 1      | 7.711         | VV   | 0.2973      | 2.66671e4    | 1380.98596   | 28.5507 |
| 2      | 8.355         | VV   | 0.2951      | 2.47724e4    | 1295.15588   | 26.5222 |
| 3      | 10.476        | VV   | 0.3237      | 2.11907e4    | 1014.38397   | 22.6875 |
| 4      | 15.041        | VB   | 0.4082      | 2.07725e4    | 796.74072    | 22.2397 |

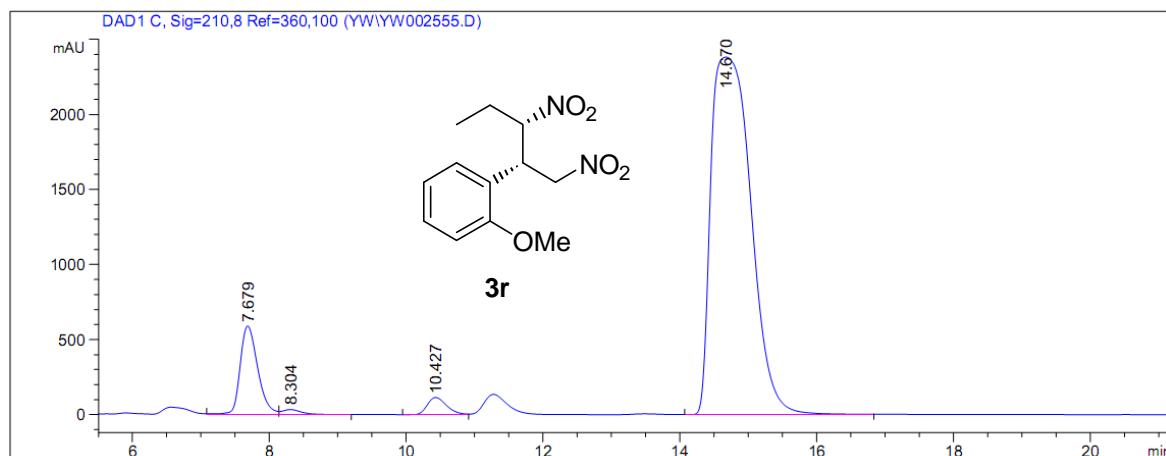

| Peak # | RetTime [min] | Type | Width [min] | Area [mAU*s] | Height [mAU] | Area %  |
|--------|---------------|------|-------------|--------------|--------------|---------|
| 1      | 7.679         | VV   | 0.2797      | 1.06288e4    | 591.22729    | 9.6402  |
| 2      | 8.304         | VB   | 0.3080      | 720.74457    | 34.46310     | 0.6537  |
| 3      | 10.427        | VV   | 0.3065      | 2266.71606   | 114.74529    | 2.0559  |
| 4      | 14.670        | VV   | 0.6574      | 9.66387e4    | 2381.38428   | 87.6502 |

**[(1*E*,3*S*,4*S*)-4-nitro-3-(nitromethyl)-1-penten-1-yl]benzene (6a)**

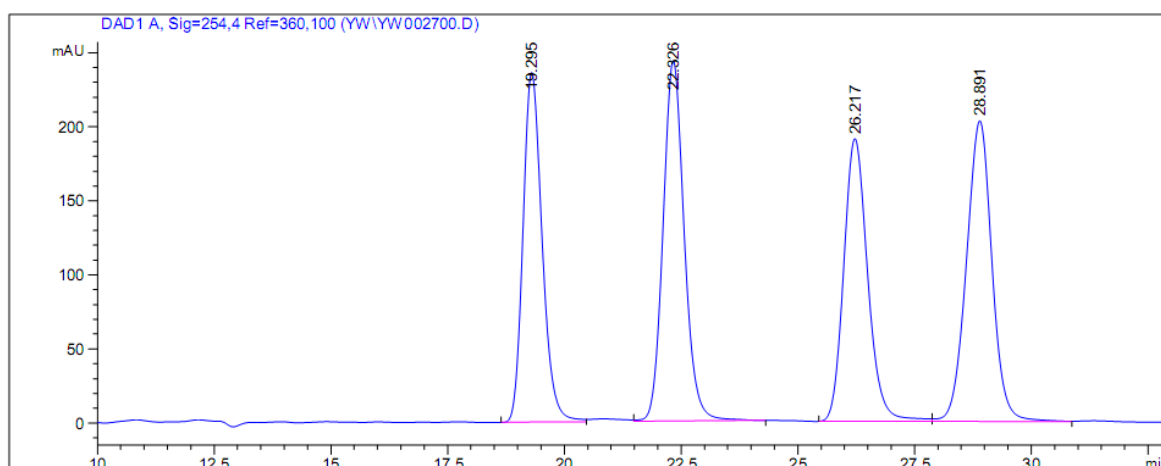

(racemic)

| Peak # | RetTime [min] | Type | Width [min] | Area [mAU*s] | Height [mAU] | Area %  |
|--------|---------------|------|-------------|--------------|--------------|---------|
| 1      | 19.295        | BV   | 0.4358      | 6718.58887   | 236.21274    | 23.1913 |
| 2      | 22.326        | VB   | 0.4842      | 7688.96924   | 243.63316    | 26.5409 |
| 3      | 26.217        | BV   | 0.5487      | 6819.81299   | 190.95496    | 23.5407 |
| 4      | 28.891        | VV   | 0.5846      | 7742.93506   | 203.19475    | 26.7271 |

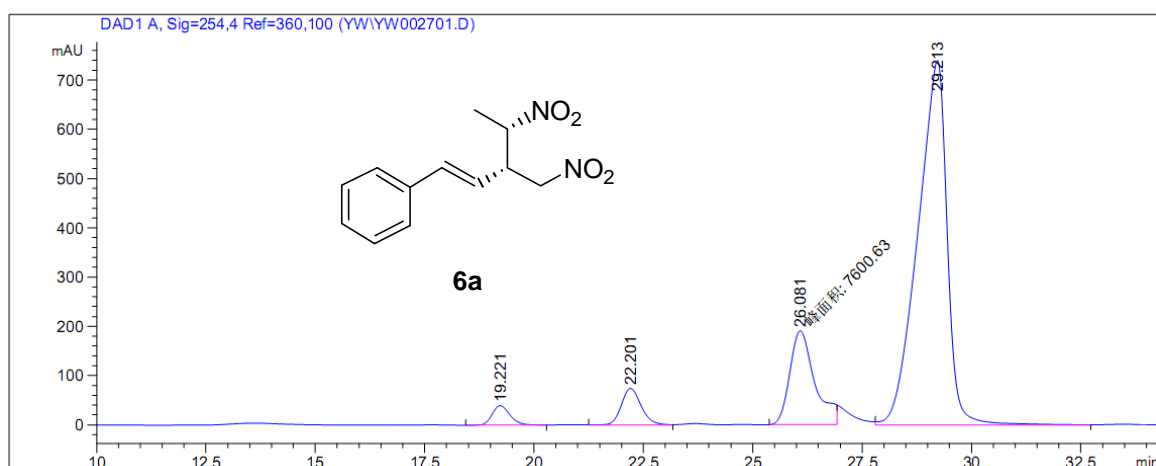

| Peak # | RetTime [min] | Type | Width [min] | Area [mAU*s] | Height [mAU] | Area %  |
|--------|---------------|------|-------------|--------------|--------------|---------|
| 1      | 19.221        | VB   | 0.4390      | 1127.67395   | 39.75204     | 2.4694  |
| 2      | 22.201        | VV   | 0.4931      | 2388.38354   | 74.69344     | 5.2301  |
| 3      | 26.081        | MM   | 0.6630      | 7600.62988   | 191.05316    | 16.6438 |
| 4      | 29.213        | VB   | 0.6723      | 3.45497e4    | 740.48212    | 75.6567 |

**1-Methoxy-4-[(1*E*,3*S*,4*S*)-4-nitro-3-(nitromethyl)-1-penten-1-yl]benzene (6b)**

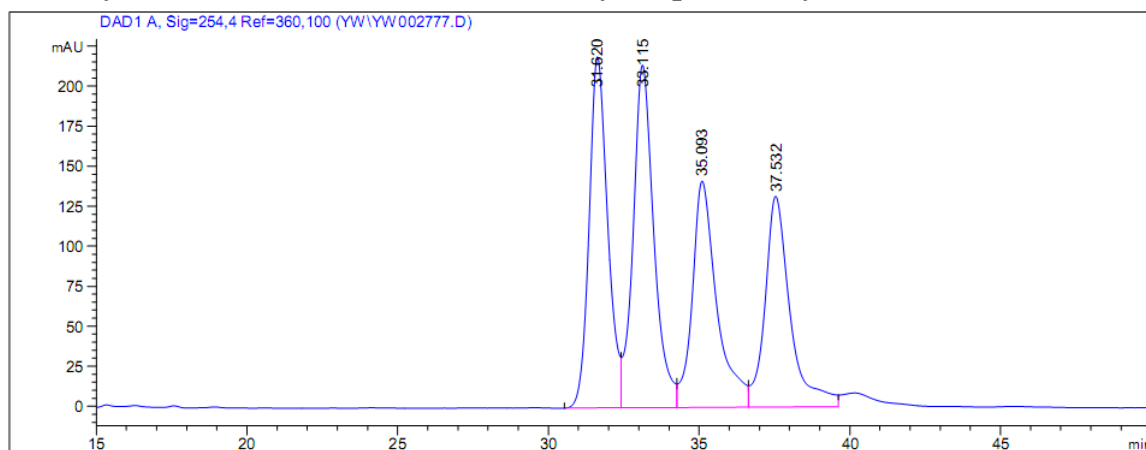

(racemic)

| Peak # | RetTime [min] | Type | Width [min] | Area [mAU*s] | Height [mAU] | Area %  |
|--------|---------------|------|-------------|--------------|--------------|---------|
| 1      | 31.620        | BV   | 0.6440      | 9403.88770   | 219.43159    | 26.5964 |
| 2      | 33.115        | VV   | 0.7102      | 1.02483e4    | 214.19907    | 28.9845 |
| 3      | 35.093        | VV   | 0.8217      | 8024.64893   | 141.48724    | 22.6956 |
| 4      | 37.532        | VV   | 0.8475      | 7680.95801   | 131.87622    | 21.7235 |

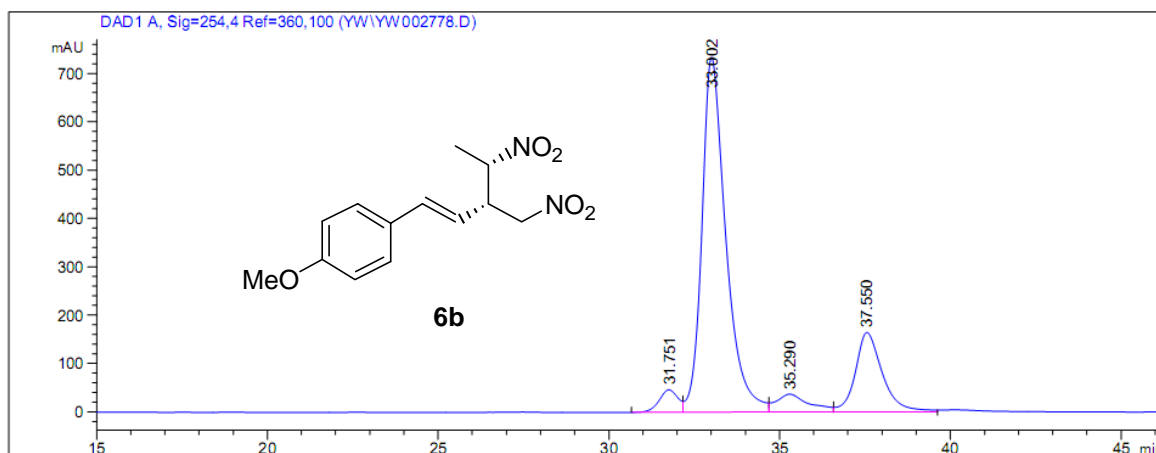

| Peak # | RetTime [min] | Type | Width [min] | Area [mAU*s] | Height [mAU] | Area %  |
|--------|---------------|------|-------------|--------------|--------------|---------|
| 1      | 31.751        | BV   | 0.5854      | 1795.97449   | 46.62074     | 3.6453  |
| 2      | 33.002        | VV   | 0.7172      | 3.58262e4    | 734.34698    | 72.7158 |
| 3      | 35.290        | VV   | 0.9353      | 2515.74365   | 37.47216     | 5.1062  |
| 4      | 37.550        | VV   | 0.8146      | 9130.84668   | 164.75151    | 18.5327 |

**(4*R*,5*R*)-tetrahydro-4-methyl-5-phenyl-2(1*H*)-pyrimidinethione (8)**

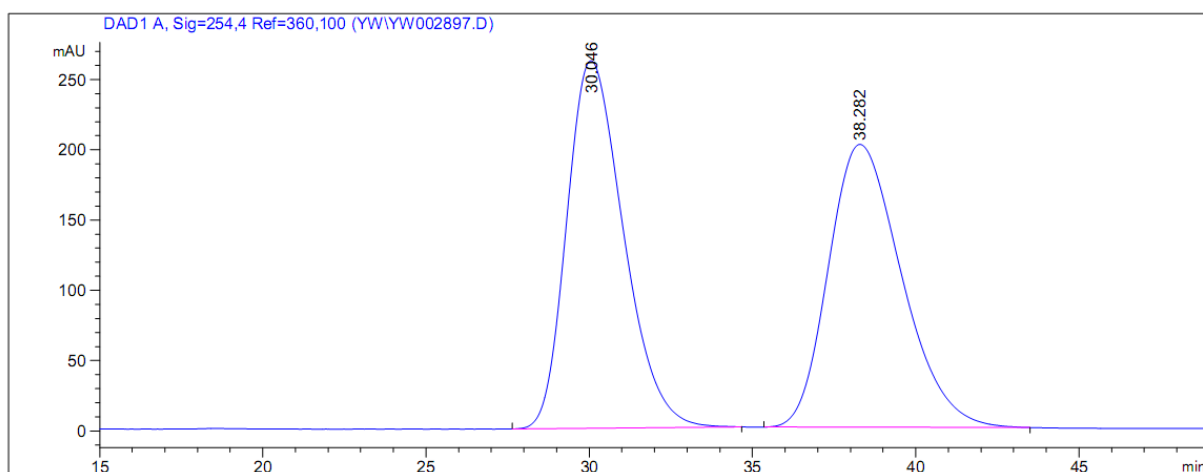

(racemic)

| Peak # | RetTime [min] | Type | Width [min] | Area [mAU*s] | Height [mAU] | Area %  |
|--------|---------------|------|-------------|--------------|--------------|---------|
| 1      | 30.046        | BB   | 1.8559      | 3.15755e4    | 261.65881    | 50.1567 |
| 2      | 38.282        | BB   | 2.4094      | 3.13782e4    | 201.43040    | 49.8433 |

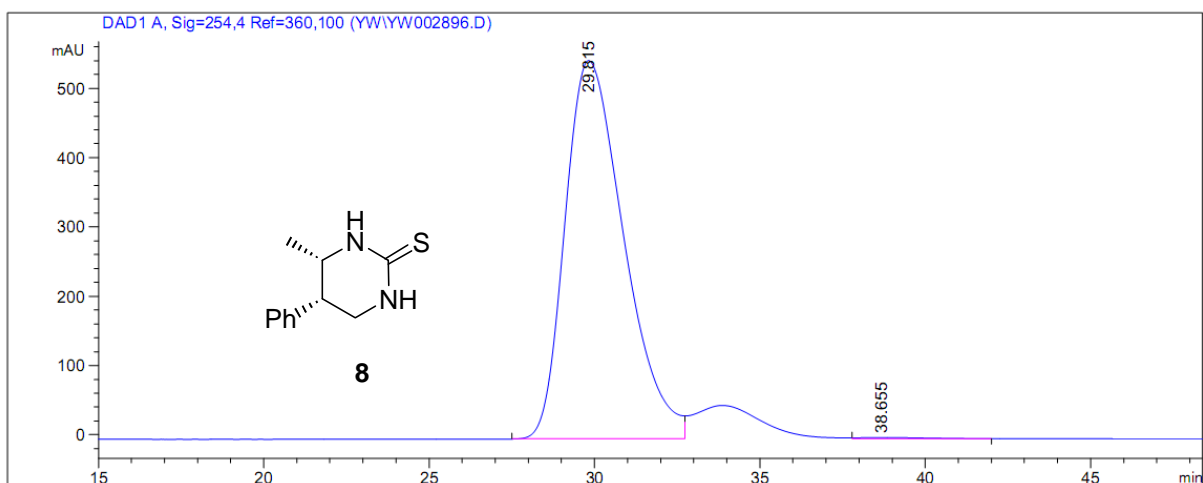

| Peak # | RetTime [min] | Type | Width [min] | Area [mAU*s] | Height [mAU] | Area %  |
|--------|---------------|------|-------------|--------------|--------------|---------|
| 1      | 29.815        | BV   | 1.9526      | 6.74441e4    | 546.18695    | 99.6260 |
| 2      | 38.655        | BB   | 1.7122      | 253.20485    | 1.74981      | 0.3740  |
